# Supplementary material for: Fat2 polarizes the WAVE complex in trans to align cell protrusions for collective migration
Source: eLife. 2022 Sep 26;11:e78343. doi: 10.7554/eLife.78343 (PMC9576270; doi:10.7554/eLife.78343)
Supplement: Figure 3—figure supplement 2—source data 3. — Used to generate Figure 3—figure supplement 2. [file elife-78343-fig3-figsupp2-data3.csv]

condition	mean_intensity_0to10	mean_intensity_80to90	lt_over_side_enrichment
fat2N1032	1.470771823	1.310252072	1.122510587
fat2N1032	1.910477441	1.588459244	1.202723613
fat2N1032	1.259259167	1.756088426	0.717081867
fat2N1032	2.333177009	3.988930889	0.584912869
fat2N1032	2.722055966	1.95942798	1.389209501
fat2N1032	1.309304075	0.678821411	1.928790186
fat2N1032	3.111295101	4.681708716	0.664564006
fat2N1032	2.512678482	2.449676301	1.025718574
fat2N1032	5.352962711	4.212950378	1.270597142
fat2N1032	1.809310239	4.067724257	0.444796679
fat2N1032	2.979709516	2.605178815	1.143763913
fat2N1032	2.376612701	3.256960517	0.729702644
w1118	8.987343191	4.325153485	2.077924685
w1118	12.9162795	5.106246452	2.529505698
w1118	7.331084803	5.338821136	1.373165464
w1118	8.849303143	2.794528226	3.166653699
w1118	10.64805462	7.047429442	1.510913263
w1118	6.735882881	3.567847469	1.887940261
w1118	11.87954042	7.255074848	1.637411146
w1118	14.42549264	8.846266521	1.630687093
w1118	12.52370591	5.767618392	2.171382546
w1118	10.79862058	6.057316436	1.782740046
w1118	13.06829692	4.677115234	2.794093424
