# Supplementary material for: Fat2 polarizes the WAVE complex in trans to align cell protrusions for collective migration
Source: eLife. 2022 Sep 26;11:e78343. doi: 10.7554/eLife.78343 (PMC9576270; doi:10.7554/eLife.78343)
Supplement: Figure 3—source data 1. [file elife-78343-fig3-data1.csv]

condition	sample number	interfaces (approx)	edges (approx)	edges*frames	protrusions*frames (by avg len)	protrusions*frames (by longest len)
w1118	1	156	312	12793	1875	1623
w1118	2	219	438	17965	1005	1060
w1118	3	187	373	15304	1823	1658
w1118	4	247	495	20279	2460	1983
w1118	5	163	326	13386	1630	1428
fat2N1032	1	202	405	16588	766	864
fat2N1032	2	197	393	16122	1999	1862
fat2N1032	3	171	343	14057	1212	1319
fat2N1032	4	133	265	10874	645	858
fat2N1032	5	234	467	19151	1977	1874
fat2N1032	6	184	368	15095	1447	1623
fat2N1032	7	193	385	15797	392	513
fat2N1032	8	131	261	10707	256	330
fat2N1032	9	94	188	7697	211	239
fat2N1032	10	168	337	13811	228	236
ck666	1	92	185	7566	84	121
ck666	2	95	191	7822	112	147
ck666	3	141	281	11532	367	394
ck666	4	130	260	10652	65	44
ck666	5	70	140	5741	239	161
