# Supplementary material for: Fat2 polarizes the WAVE complex in trans to align cell protrusions for collective migration
Source: eLife. 2022 Sep 26;11:e78343. doi: 10.7554/eLife.78343 (PMC9576270; doi:10.7554/eLife.78343)
Supplement: Figure 5—figure supplement 1—source data 1. — Used to generate Figure 5—figure supplement 1D. [file elife-78343-fig5-figsupp1-data1.csv]

Genotype	Sample	Migration speed (um/min)
w1118	1	0.551507453706798
w1118	2	0.420594068230942
w1118	3	0.637854580297257
w1118	4	0.377412636599046
w1118	5	0.446339265807395
w1118	6	0.719417758193803
w1118	7	0.569148264515602
w1118	8	0.853258164910013
w1118	9	0.744171545350134
w1118	10	0.851401237456454
w1118	11	0.695828484864278
w1118	12	0.755600662011518
w1118	13	0.696788421937729
w1118	14	0.570422935055757
w1118	15	0.768547026218834
w1118	16	0.461430735535889
w1118	17	0.717702460800261
w1118	18	0.584932147870848
Sra1GFPx1	1	0.640718654844271
Sra1GFPx1	2	0.945154783067811
Sra1GFPx1	3	0.583736160697369
Sra1GFPx1	4	0.855125153515376
Sra1GFPx1	5	0.47933906979139
Sra1GFPx1	6	0.719134498073769
Sra1GFPx1	7	0.649751505338698
Sra1GFPx1	8	0.185570979621165
Sra1GFPx1	9	0.718961394667081
Sra1GFPx1	10	0.318463058285239
Sra1GFPx1	11	0.74091405396974
Sra1GFPx1	12	0.48651499283226
Sra1GFPx1	13	0.8671851208117
Sra1GFPx1	14	0.363957780897415
Sra1GFPx1	15	0.559863627247811
Sra1GFPx1	16	0.27674513727352
Sra1GFPx1	17	0.532938179171216
Sra1GFPx1	18	0.60350142240643
Sra1GFPx2	1	0.259183009831392
Sra1GFPx2	2	0.439887229739946
Sra1GFPx2	3	0.240472105235793
Sra1GFPx2	4	0.0334246941640484
Sra1GFPx2	5	0.0724201706887715
Sra1GFPx2	6	0.172694253180917
Sra1GFPx2	7	0.423379459411279
Sra1GFPx2	8	0.400167866241802
Sra1GFPx2	9	0.284109900394412
Sra1GFPx2	10	0.466316527228933
Sra1GFPx2	11	0.472588036930574
Sra1GFPx2	12	0.365814708350974
Sra1GFPx2	13	0.178265035541591
Sra1GFPx2	14	0.508404228572689
Sra1GFPx2	15	0.229330540514443
Sra1GFPx2	16	0.302270021423277
