# Supplementary material for: Fat2 polarizes the WAVE complex in trans to align cell protrusions for collective migration
Source: eLife. 2022 Sep 26;11:e78343. doi: 10.7554/eLife.78343 (PMC9576270; doi:10.7554/eLife.78343)
Supplement: Figure 5—figure supplement 2—source data 1. — Used to generate Figure 5—figure supplement 2. [file elife-78343-fig5-figsupp2-data1.csv]

condition	mean_tissue	mean_edges	mean_interiors	mean_edges_minus_interiors
fat2N1032	5.723823883	7.631670264	5.187934439	2.443735825
fat2N1032	7.17709854	9.98866151	6.193363717	3.795297794
fat2N1032	6.009336791	7.884168512	5.408398138	2.475770374
fat2N1032	6.476418504	8.485690196	5.936529587	2.549160609
fat2N1032	7.37062205	9.260080836	6.612690974	2.647389861
fat2N1032	6.946778286	9.214392042	6.074620671	3.139771371
fat2N1032	5.733526295	8.300684581	4.955387271	3.34529731
fat2N1032	5.077438178	6.735475278	4.522487492	2.212987786
fat2N1032	7.455716651	9.939347259	6.557964723	3.381382536
fat2N1032	7.378925176	10.23837022	6.248628597	3.989741623
fat2N1032	7.398649154	9.863750649	6.535154033	3.328596615
fat2N1032	6.664822044	9.01875864	5.756758337	3.262000303
fat2N1032	5.83627056	7.696568672	5.232207413	2.464361259
fat2N1032	5.45546918	7.655573138	4.705168057	2.950405081
fat2N1032	4.636234699	5.948741299	4.072236935	1.876504364
fat2N1032	5.628954103	7.171640171	5.027260633	2.144379538
fat2N1032	6.732771646	9.277952675	5.780043969	3.497908706
fat2N1032	6.190376723	8.070914859	5.608687874	2.462226985
fat2N1032	3.664183573	4.583174132	3.377794074	1.205380058
fat2N1032	6.451501094	8.60720785	5.719893487	2.887314363
w1118	5.684448284	9.557730411	4.211116037	5.346614375
w1118	5.458539446	8.908936769	4.236385543	4.672551226
w1118	5.011351249	8.331516272	3.591390853	4.740125419
w1118	5.697909649	9.613572305	4.208773999	5.404798306
w1118	6.023075609	9.845917818	4.406980934	5.438936884
w1118	5.744584363	9.266560606	4.39315043	4.873410176
w1118	6.553526933	10.39572521	4.882358309	5.513366897
w1118	6.776781794	10.72771581	4.983596899	5.744118907
w1118	7.023013077	10.98684299	5.519573334	5.467269654
w1118	7.352993927	11.77101181	5.857431936	5.913579874
w1118	6.461394656	10.11124784	5.019406602	5.091841239
w1118	7.026655501	10.8954493	5.391622652	5.503826645
w1118	7.456546481	11.36202322	5.882334338	5.479688878
w1118	7.094300392	11.25872934	5.199316156	6.05941318
w1118	7.579610762	11.72162652	5.965629048	5.75599747
w1118	5.992293705	9.411500371	4.549529643	4.861970728
w1118	7.070755175	11.05437031	5.645076192	5.409294116
w1118	7.574269061	11.69719851	6.171563483	5.525635026
w1118	6.953034331	10.41626556	5.514871887	4.901393672
