# Supplementary material for: Fat2 polarizes the WAVE complex in trans to align cell protrusions for collective migration
Source: eLife. 2022 Sep 26;11:e78343. doi: 10.7554/eLife.78343 (PMC9576270; doi:10.7554/eLife.78343)
Supplement: Figure 5—figure supplement 2—source data 2. — Used to generate Figure 5—figure supplement 2. [file elife-78343-fig5-figsupp2-data2.csv]

	condition	angle bin min (deg)	angle bin max (deg)	Sra1 mean	Sra1 stdev	Sra1 mean rescaled	Sra1 stdev rescaled
0	w1118	0	5.294117647	5.006417112	2.866578174	1.302982023	0.746062452
1	w1118	5.294117647	10.58823529	5.120833333	2.56090913	1.33276026	0.6665083
2	w1118	10.58823529	15.88235294	5.022797927	2.451185442	1.307245333	0.637951352
3	w1118	15.88235294	21.17647059	4.82513089	2.238448764	1.255800039	0.582583998
4	w1118	21.17647059	26.47058824	4.954639175	2.509919159	1.289506174	0.653237529
5	w1118	26.47058824	31.76470588	4.687068966	2.362111966	1.219867715	0.614768877
6	w1118	31.76470588	37.05882353	4.924863388	2.365171802	1.281756656	0.615565237
7	w1118	37.05882353	42.35294118	4.442774566	2.524481256	1.156287073	0.657027495
8	w1118	42.35294118	47.64705882	4.123966942	2.313401676	1.073313443	0.602091421
9	w1118	47.64705882	52.94117647	3.741089109	2.402592645	0.973664748	0.625304475
10	w1118	52.94117647	58.23529412	3.434871795	2.294335118	0.893967901	0.597129114
11	w1118	58.23529412	63.52941176	3.281491003	2.546225595	0.854048652	0.662686728
12	w1118	63.52941176	68.82352941	2.623333333	1.858574487	0.682754971	0.483717016
13	w1118	68.82352941	74.11764706	2.553212851	1.888043423	0.664505248	0.491386671
14	w1118	74.11764706	79.41176471	2.268833333	1.75470138	0.590491958	0.456682754
15	w1118	79.41176471	84.70588235	2.108121827	1.559683266	0.5486648	0.405926876
16	w1118	84.70588235	90	2.199253731	1.46639019	0.572383006	0.381646198
0	fat2N1032	0	5.294117647	2.032093023	1.862001433	1.070495263	0.980891963
1	fat2N1032	5.294117647	10.58823529	1.90798005	2.002919409	1.005113242	1.055126766
2	fat2N1032	10.58823529	15.88235294	1.923448276	1.670564371	1.013261817	0.880043987
3	fat2N1032	15.88235294	21.17647059	1.997362637	1.740611591	1.05219949	0.916944472
4	fat2N1032	21.17647059	26.47058824	1.929882353	1.701601974	1.016651253	0.896394423
5	fat2N1032	26.47058824	31.76470588	2.040862944	1.972051609	1.075115209	1.038865781
6	fat2N1032	31.76470588	37.05882353	1.863092269	1.701891422	0.981466609	0.896546903
7	fat2N1032	37.05882353	42.35294118	1.925552826	1.842488579	1.014370482	0.9706127
8	fat2N1032	42.35294118	47.64705882	1.920674157	1.735382839	1.011800427	0.914189994
9	fat2N1032	47.64705882	52.94117647	1.940779221	1.885436072	1.022391662	0.9932372
10	fat2N1032	52.94117647	58.23529412	1.762210797	1.599915026	0.928322813	0.842826306
11	fat2N1032	58.23529412	63.52941176	1.828571429	1.648084287	0.963281223	0.868201604
12	fat2N1032	63.52941176	68.82352941	1.983333333	1.810098541	1.044808931	0.953549809
13	fat2N1032	68.82352941	74.11764706	1.856792873	1.774221271	0.978148122	0.934649864
14	fat2N1032	74.11764706	79.41176471	1.887804878	1.704440558	0.994485074	0.897889773
15	fat2N1032	79.41176471	84.70588235	1.754525862	1.683030856	0.924274432	0.886611262
16	fat2N1032	84.70588235	90	1.715686275	2.076399449	0.903813954	1.093835641
