# Supplementary material for: Fat2 polarizes the WAVE complex in trans to align cell protrusions for collective migration
Source: eLife. 2022 Sep 26;11:e78343. doi: 10.7554/eLife.78343 (PMC9576270; doi:10.7554/eLife.78343)
Supplement: Figure 5—figure supplement 2—source data 3. — Used to generate Figure 5—figure supplement 2. [file elife-78343-fig5-figsupp2-data3.csv]

condition	mean_intensity_0to10	mean_intensity_80to90	lt_over_side_enrichment
fat2N1032	2.538909421	1.802976455	1.408176692
fat2N1032	2.742044267	2.410486947	1.13754786
fat2N1032	1.954090866	1.588397785	1.230227645
fat2N1032	1.625435365	1.562496645	1.040280868
fat2N1032	1.809109023	1.604612677	1.127442808
fat2N1032	1.99241404	2.058798331	0.967755807
fat2N1032	2.461120161	2.881020103	0.854253033
fat2N1032	1.445398646	1.164628158	1.241081659
fat2N1032	2.040614587	1.986517536	1.027232103
fat2N1032	2.408221435	2.364970723	1.018288054
fat2N1032	3.443900895	1.855358862	1.856191255
fat2N1032	2.067208418	1.909805304	1.082418408
fat2N1032	1.569254883	1.600993049	0.98017595
fat2N1032	1.995902761	1.919104127	1.040017961
fat2N1032	1.427047675	1.001057456	1.425540229
fat2N1032	1.23371939	1.366540344	0.902804953
fat2N1032	2.571499107	2.322282602	1.107315322
fat2N1032	1.728330543	1.528922382	1.130423993
fat2N1032	0.564411116	1.083065745	0.521123597
fat2N1032	2.157664583	1.553029637	1.389326083
w1118	3.885339051	2.253007513	1.724512248
w1118	3.730699609	1.977409046	1.886660535
w1118	3.260812169	1.978413091	1.648195811
w1118	3.931146735	2.591703422	1.516819672
w1118	4.857738936	2.888533751	1.681731755
w1118	5.268331003	1.849961626	2.847805559
w1118	7.078889093	1.825129246	3.878568659
w1118	5.095207382	2.586592925	1.969852825
w1118	6.511195555	2.264370839	2.875498767
w1118	6.267394339	2.264033405	2.768242874
w1118	5.204397282	1.807549734	2.879255373
w1118	5.893349407	1.60544981	3.670840017
w1118	4.418791772	2.203205236	2.005619676
w1118	6.681111086	2.595349181	2.574262891
w1118	5.810643515	2.02100295	2.875128666
w1118	6.491454567	1.553469436	4.17868187
w1118	5.639379334	1.874105956	3.00910379
w1118	4.430015214	2.422892036	1.828399759
w1118	4.436731165	2.713239358	1.635215541
