# Supplementary material for: Fat2 polarizes the WAVE complex in trans to align cell protrusions for collective migration
Source: eLife. 2022 Sep 26;11:e78343. doi: 10.7554/eLife.78343 (PMC9576270; doi:10.7554/eLife.78343)
Supplement: Figure 5—figure supplement 2—source data 4. — Used to generate Figure 5—figure supplement 2. [file elife-78343-fig5-figsupp2-data4.csv]

Genotypes	Sample	Cell region	mean fluorescence intensity	fluorescence rescaled by dataset	fluorescence rescaled by sample
wt_wtAhead	1	leading-trailing interface	20.593	0.781	0.944
wt_wtAhead	1	leading-trailing interface	15.47	0.587	0.709
wt_wtAhead	1	leading-trailing interface	23.513	0.892	1.077
wt_wtAhead	1	leading-trailing interface	21.265	0.807	0.974
wt_wtAhead	1	leading-trailing interface	22.236	0.844	1.019
wt_wtAhead	1	leading-trailing interface	24.453	0.928	1.12
wt_wtAhead	1	leading-trailing interface	25.61	0.972	1.173
wt_wtAhead	1	leading-trailing interface	23.413	0.888	1.073
wt_wtAhead	1	leading-trailing interface	22.121	0.839	1.014
wt_wtAhead	1	leading-trailing interface	21.462	0.814	0.983
wt_wtAhead	1	leading-trailing interface	19.939	0.757	0.914
wt_wtAhead	2	leading-trailing interface	21.538	0.817	1.033
wt_wtAhead	2	leading-trailing interface	25.09	0.952	1.204
wt_wtAhead	2	leading-trailing interface	21.652	0.822	1.039
wt_wtAhead	2	leading-trailing interface	17.032	0.646	0.817
wt_wtAhead	2	leading-trailing interface	20.479	0.777	0.982
wt_wtAhead	2	leading-trailing interface	23.283	0.883	1.117
wt_wtAhead	2	leading-trailing interface	16.774	0.636	0.805
wt_wtAhead	2	leading-trailing interface	18.097	0.687	0.868
wt_wtAhead	2	leading-trailing interface	23.712	0.9	1.137
wt_wtAhead	2	leading-trailing interface	21.228	0.805	1.018
wt_wtAhead	2	leading-trailing interface	28.584	1.085	1.371
wt_wtAhead	2	leading-trailing interface	14.289	0.542	0.685
wt_wtAhead	2	leading-trailing interface	19.237	0.73	0.923
wt_wtAhead	3	leading-trailing interface	23.322	0.885	0.872
wt_wtAhead	3	leading-trailing interface	25.368	0.963	0.948
wt_wtAhead	3	leading-trailing interface	23.553	0.894	0.881
wt_wtAhead	3	leading-trailing interface	24.076	0.914	0.9
wt_wtAhead	3	leading-trailing interface	27.791	1.055	1.039
wt_wtAhead	3	leading-trailing interface	29.052	1.102	1.086
wt_wtAhead	3	leading-trailing interface	24.987	0.948	0.934
wt_wtAhead	3	leading-trailing interface	24.716	0.938	0.924
wt_wtAhead	3	leading-trailing interface	28.313	1.074	1.059
wt_wtAhead	3	leading-trailing interface	22.514	0.854	0.842
wt_wtAhead	3	leading-trailing interface	23.893	0.907	0.893
wt_wtAhead	3	leading-trailing interface	23.582	0.895	0.882
wt_wtAhead	3	leading-trailing interface	35.148	1.334	1.314
wt_wtAhead	3	leading-trailing interface	38.13	1.447	1.426
wt_wtAhead	4	leading-trailing interface	19.163	0.727	0.785
wt_wtAhead	4	leading-trailing interface	22.621	0.858	0.926
wt_wtAhead	4	leading-trailing interface	25.618	0.972	1.049
wt_wtAhead	4	leading-trailing interface	33.507	1.271	1.372
wt_wtAhead	4	leading-trailing interface	21.379	0.811	0.875
wt_wtAhead	4	leading-trailing interface	24.687	0.937	1.011
wt_wtAhead	4	leading-trailing interface	23.257	0.882	0.952
wt_wtAhead	4	leading-trailing interface	24.956	0.947	1.022
wt_wtAhead	4	leading-trailing interface	25.52	0.968	1.045
wt_wtAhead	4	leading-trailing interface	25.579	0.971	1.047
wt_wtAhead	4	leading-trailing interface	23.565	0.894	0.965
wt_wtAhead	4	leading-trailing interface	23.218	0.881	0.951
wt_wtAhead	5	leading-trailing interface	25.674	0.974	1.041
wt_wtAhead	5	leading-trailing interface	21.696	0.823	0.879
wt_wtAhead	5	leading-trailing interface	21.622	0.82	0.876
wt_wtAhead	5	leading-trailing interface	24.123	0.915	0.978
wt_wtAhead	5	leading-trailing interface	24.866	0.944	1.008
wt_wtAhead	5	leading-trailing interface	32.805	1.245	1.33
wt_wtAhead	5	leading-trailing interface	25.57	0.97	1.036
wt_wtAhead	5	leading-trailing interface	26.716	1.014	1.083
wt_wtAhead	5	leading-trailing interface	26.086	0.99	1.057
wt_wtAhead	5	leading-trailing interface	26.152	0.992	1.06
wt_wtAhead	5	leading-trailing interface	25.447	0.966	1.031
wt_wtAhead	5	leading-trailing interface	25.564	0.97	1.036
wt_wtAhead	5	leading-trailing interface	21.489	0.815	0.871
wt_wtAhead	5	leading-trailing interface	24.454	0.928	0.991
wt_wtAhead	5	leading-trailing interface	23.881	0.906	0.968
wt_wtAhead	5	leading-trailing interface	22.372	0.849	0.907
wt_wtAhead	5	leading-trailing interface	22.767	0.864	0.923
wt_wtAhead	5	leading-trailing interface	22.838	0.867	0.926
wt_wtAhead	6	leading-trailing interface	28.104	1.066	1.077
wt_wtAhead	6	leading-trailing interface	27.12	1.029	1.04
wt_wtAhead	6	leading-trailing interface	26.821	1.018	1.028
wt_wtAhead	6	leading-trailing interface	24.443	0.927	0.937
wt_wtAhead	6	leading-trailing interface	22.464	0.852	0.861
wt_wtAhead	6	leading-trailing interface	22.766	0.864	0.873
wt_wtAhead	6	leading-trailing interface	25.529	0.969	0.979
wt_wtAhead	6	leading-trailing interface	24.672	0.936	0.946
wt_wtAhead	6	leading-trailing interface	29.308	1.112	1.123
wt_wtAhead	6	leading-trailing interface	30.609	1.161	1.173
wt_wtAhead	6	leading-trailing interface	26.317	0.999	1.009
wt_wtAhead	6	leading-trailing interface	24.92	0.946	0.955
wt_wtAhead	8	leading-trailing interface	27.242	1.034	0.96
wt_wtAhead	8	leading-trailing interface	34.781	1.32	1.225
wt_wtAhead	8	leading-trailing interface	27.361	1.038	0.964
wt_wtAhead	8	leading-trailing interface	28.918	1.097	1.019
wt_wtAhead	8	leading-trailing interface	25.552	0.97	0.9
wt_wtAhead	8	leading-trailing interface	28.979	1.1	1.021
wt_wtAhead	8	leading-trailing interface	24.199	0.918	0.853
wt_wtAhead	8	leading-trailing interface	29.124	1.105	1.026
wt_wtAhead	8	leading-trailing interface	32.68	1.24	1.151
wt_wtAhead	8	leading-trailing interface	29.124	1.105	1.026
wt_wtAhead	8	leading-trailing interface	24.237	0.92	0.854
wt_wtAhead	9	leading-trailing interface	31.075	1.179	1.126
wt_wtAhead	9	leading-trailing interface	29.321	1.113	1.062
wt_wtAhead	9	leading-trailing interface	29.392	1.115	1.065
wt_wtAhead	9	leading-trailing interface	22.863	0.868	0.828
wt_wtAhead	9	leading-trailing interface	25.081	0.952	0.908
wt_wtAhead	9	leading-trailing interface	32.576	1.236	1.18
wt_wtAhead	9	leading-trailing interface	30.177	1.145	1.093
wt_wtAhead	9	leading-trailing interface	26.836	1.018	0.972
wt_wtAhead	9	leading-trailing interface	23.498	0.892	0.851
wt_wtAhead	9	leading-trailing interface	23.458	0.89	0.85
wt_wtAhead	9	leading-trailing interface	23.067	0.875	0.836
wt_wtAhead	9	leading-trailing interface	30.622	1.162	1.109
wt_wtAhead	9	leading-trailing interface	30.945	1.174	1.121
wt_wtAhead	11	leading-trailing interface	27.42	1.04	0.848
wt_wtAhead	11	leading-trailing interface	26.89	1.02	0.832
wt_wtAhead	11	leading-trailing interface	29.13	1.105	0.901
wt_wtAhead	11	leading-trailing interface	30.684	1.164	0.949
wt_wtAhead	11	leading-trailing interface	27.627	1.048	0.854
wt_wtAhead	11	leading-trailing interface	34.849	1.322	1.078
wt_wtAhead	11	leading-trailing interface	33.331	1.265	1.031
wt_wtAhead	11	leading-trailing interface	40.634	1.542	1.257
wt_wtAhead	11	leading-trailing interface	27.103	1.028	0.838
wt_wtAhead	11	leading-trailing interface	43.184	1.639	1.335
wt_wtAhead	11	leading-trailing interface	27.983	1.062	0.865
wt_wtAhead	11	leading-trailing interface	31.026	1.177	0.959
wt_wtAhead	11	leading-trailing interface	30.806	1.169	0.953
wt_wtAhead	11	leading-trailing interface	37.885	1.438	1.172
wt_wtAhead	11	leading-trailing interface	39.564	1.501	1.224
wt_wtAhead	11	leading-trailing interface	29.263	1.11	0.905
wt_wtAhead	12	leading-trailing interface	21.307	0.808	0.806
wt_wtAhead	12	leading-trailing interface	21.313	0.809	0.807
wt_wtAhead	12	leading-trailing interface	31.337	1.189	1.186
wt_wtAhead	12	leading-trailing interface	22.511	0.854	0.852
wt_wtAhead	12	leading-trailing interface	19.799	0.751	0.749
wt_wtAhead	12	leading-trailing interface	28.831	1.094	1.091
wt_wtAhead	12	leading-trailing interface	25.241	0.958	0.955
wt_wtAhead	12	leading-trailing interface	28.813	1.093	1.09
wt_wtAhead	12	leading-trailing interface	29.282	1.111	1.108
wt_wtAhead	12	leading-trailing interface	31.299	1.188	1.185
wt_wtAhead	12	leading-trailing interface	24.994	0.948	0.946
wt_wtAhead	12	leading-trailing interface	34.1	1.294	1.291
wt_wtAhead	12	leading-trailing interface	27.708	1.051	1.049
wt_wtAhead	12	leading-trailing interface	23.385	0.887	0.885
wt_wtAhead	14	leading-trailing interface	21.208	0.805	0.896
wt_wtAhead	14	leading-trailing interface	26.993	1.024	1.141
wt_wtAhead	14	leading-trailing interface	25.413	0.964	1.074
wt_wtAhead	14	leading-trailing interface	24.623	0.934	1.041
wt_wtAhead	14	leading-trailing interface	21.906	0.831	0.926
wt_wtAhead	14	leading-trailing interface	21.901	0.831	0.926
wt_wtAhead	14	leading-trailing interface	28.049	1.064	1.186
wt_wtAhead	14	leading-trailing interface	21.46	0.814	0.907
wt_wtAhead	14	leading-trailing interface	23.788	0.903	1.006
wt_wtAhead	14	leading-trailing interface	21.233	0.806	0.898
wt_wtAhead	15	leading-trailing interface	29.697	1.127	0.907
wt_wtAhead	15	leading-trailing interface	20.745	0.787	0.634
wt_wtAhead	15	leading-trailing interface	37.509	1.423	1.146
wt_wtAhead	15	leading-trailing interface	39.793	1.51	1.216
wt_wtAhead	15	leading-trailing interface	25.304	0.96	0.773
wt_wtAhead	15	leading-trailing interface	36.887	1.4	1.127
wt_wtAhead	15	leading-trailing interface	30.061	1.141	0.918
wt_wtAhead	15	leading-trailing interface	33.817	1.283	1.033
wt_wtAhead	15	leading-trailing interface	34.004	1.29	1.039
wt_wtAhead	15	leading-trailing interface	37.26	1.414	1.138
wt_wtAhead	15	leading-trailing interface	34.971	1.327	1.068
wt_wtAhead	16	leading-trailing interface	25.255	0.958	0.934
wt_wtAhead	16	leading-trailing interface	25.678	0.974	0.95
wt_wtAhead	16	leading-trailing interface	28.289	1.073	1.046
wt_wtAhead	16	leading-trailing interface	29.169	1.107	1.079
wt_wtAhead	16	leading-trailing interface	24.66	0.936	0.912
wt_wtAhead	16	leading-trailing interface	31.676	1.202	1.172
wt_wtAhead	16	leading-trailing interface	31.317	1.188	1.158
wt_wtAhead	16	leading-trailing interface	22.885	0.868	0.846
wt_wtAhead	16	leading-trailing interface	25.926	0.984	0.959
wt_wtAhead	16	leading-trailing interface	24.764	0.94	0.916
wt_wtAhead	16	leading-trailing interface	27.794	1.055	1.028
wt_wtAhead	17	leading-trailing interface	30.916	1.173	1.069
wt_wtAhead	17	leading-trailing interface	24.105	0.915	0.834
wt_wtAhead	17	leading-trailing interface	27.151	1.03	0.939
wt_wtAhead	17	leading-trailing interface	28.002	1.063	0.969
wt_wtAhead	17	leading-trailing interface	27.838	1.056	0.963
wt_wtAhead	17	leading-trailing interface	26.943	1.022	0.932
wt_wtAhead	17	leading-trailing interface	34.119	1.295	1.18
wt_wtAhead	17	leading-trailing interface	30.951	1.174	1.071
wt_wtAhead	17	leading-trailing interface	28.713	1.089	0.993
wt_wtAhead	17	leading-trailing interface	20.384	0.773	0.705
wt_wtAhead	17	leading-trailing interface	38.857	1.474	1.344
wt_wtAhead	18	leading-trailing interface	26.205	0.994	0.963
wt_wtAhead	18	leading-trailing interface	27.892	1.058	1.026
wt_wtAhead	18	leading-trailing interface	22.978	0.872	0.845
wt_wtAhead	18	leading-trailing interface	26.568	1.008	0.977
wt_wtAhead	18	leading-trailing interface	26.825	1.018	0.986
wt_wtAhead	18	leading-trailing interface	25.391	0.963	0.934
wt_wtAhead	18	leading-trailing interface	34.396	1.305	1.265
wt_wtAhead	18	leading-trailing interface	27.166	1.031	0.999
wt_wtAhead	18	leading-trailing interface	27.364	1.038	1.006
wt_wtAhead	19	leading-trailing interface	20.361	0.773	0.847
wt_wtAhead	19	leading-trailing interface	28.205	1.07	1.174
wt_wtAhead	19	leading-trailing interface	18.925	0.718	0.788
wt_wtAhead	19	leading-trailing interface	27.394	1.039	1.14
wt_wtAhead	19	leading-trailing interface	27.174	1.031	1.131
wt_wtAhead	19	leading-trailing interface	20.881	0.792	0.869
wt_wtAhead	19	leading-trailing interface	20.777	0.788	0.865
wt_wtAhead	19	leading-trailing interface	21.234	0.806	0.884
wt_wtAhead	19	leading-trailing interface	26.008	0.987	1.083
wt_wtAhead	19	leading-trailing interface	24	0.911	0.999
wt_wtAhead	19	leading-trailing interface	23.14	0.878	0.963
wt_wtAhead	19	leading-trailing interface	25.197	0.956	1.049
wt_wtAhead	19	leading-trailing interface	29.031	1.102	1.208
wt_wtAhead	20	leading-trailing interface	24.874	0.944	0.939
wt_wtAhead	20	leading-trailing interface	25.278	0.959	0.954
wt_wtAhead	20	leading-trailing interface	24.861	0.943	0.938
wt_wtAhead	20	leading-trailing interface	26.573	1.008	1.003
wt_wtAhead	20	leading-trailing interface	26.545	1.007	1.002
wt_wtAhead	20	leading-trailing interface	29.461	1.118	1.112
wt_wtAhead	20	leading-trailing interface	27.339	1.037	1.032
wt_wtAhead	20	leading-trailing interface	28.542	1.083	1.077
wt_wtAhead	20	leading-trailing interface	28.748	1.091	1.085
wt_wtAhead	20	leading-trailing interface	22.737	0.863	0.858
wt_wtAhead	21	leading-trailing interface	21.889	0.831	0.992
wt_wtAhead	21	leading-trailing interface	18.191	0.69	0.824
wt_wtAhead	21	leading-trailing interface	24.101	0.914	1.092
wt_wtAhead	21	leading-trailing interface	21.642	0.821	0.98
wt_wtAhead	21	leading-trailing interface	23.206	0.881	1.051
wt_wtAhead	21	leading-trailing interface	18.11	0.687	0.82
wt_wtAhead	21	leading-trailing interface	22.949	0.871	1.04
wt_wtAhead	21	leading-trailing interface	22.483	0.853	1.019
wt_wtAhead	21	leading-trailing interface	21.315	0.809	0.966
wt_wtAhead	21	leading-trailing interface	23.499	0.892	1.065
wt_wtAhead	21	leading-trailing interface	21.957	0.833	0.995
wt_wtAhead	21	leading-trailing interface	21.881	0.83	0.991
wt_wtAhead	21	leading-trailing interface	25.724	0.976	1.165
wt_wtAhead	23	leading-trailing interface	23.489	0.891	0.829
wt_wtAhead	23	leading-trailing interface	27.201	1.032	0.961
wt_wtAhead	23	leading-trailing interface	32.099	1.218	1.134
wt_wtAhead	23	leading-trailing interface	33.889	1.286	1.197
wt_wtAhead	23	leading-trailing interface	28.166	1.069	0.995
wt_wtAhead	23	leading-trailing interface	29.467	1.118	1.041
wt_wtAhead	23	leading-trailing interface	28.921	1.097	1.021
wt_wtAhead	23	leading-trailing interface	30.073	1.141	1.062
wt_wtAhead	23	leading-trailing interface	20.976	0.796	0.741
wt_wtAhead	23	leading-trailing interface	28.897	1.096	1.02
wt_wtAhead	24	leading-trailing interface	25.224	0.957	0.822
wt_wtAhead	24	leading-trailing interface	28.712	1.089	0.936
wt_wtAhead	24	leading-trailing interface	36.292	1.377	1.183
wt_wtAhead	24	leading-trailing interface	33.012	1.253	1.076
wt_wtAhead	24	leading-trailing interface	29.631	1.124	0.966
wt_wtAhead	24	leading-trailing interface	29.14	1.106	0.95
wt_wtAhead	24	leading-trailing interface	27.76	1.053	0.905
wt_wtAhead	24	leading-trailing interface	25.143	0.954	0.82
wt_wtAhead	24	leading-trailing interface	27.955	1.061	0.911
wt_wtAhead	24	leading-trailing interface	28.951	1.099	0.944
wt_wtAhead	24	leading-trailing interface	22.496	0.854	0.733
wt_wtAhead	24	leading-trailing interface	26.207	0.994	0.854
wt_wtAhead	24	leading-trailing interface	39.868	1.513	1.3
wt_wtAhead	24	leading-trailing interface	44.643	1.694	1.456
wt_wtAhead	24	leading-trailing interface	38.495	1.461	1.255
wt_wtAhead	24	leading-trailing interface	27.211	1.032	0.887
wt_wtAhead	25	leading-trailing interface	23.696	0.899	1.013
wt_wtAhead	25	leading-trailing interface	20.631	0.783	0.882
wt_wtAhead	25	leading-trailing interface	24.621	0.934	1.052
wt_wtAhead	25	leading-trailing interface	25.659	0.974	1.097
wt_wtAhead	25	leading-trailing interface	24.268	0.921	1.037
wt_wtAhead	25	leading-trailing interface	25.917	0.983	1.108
wt_wtAhead	25	leading-trailing interface	27.921	1.059	1.193
wt_wtAhead	25	leading-trailing interface	20.808	0.79	0.889
wt_wtAhead	25	leading-trailing interface	23.733	0.901	1.014
wt_wtAhead	25	leading-trailing interface	20.007	0.759	0.855
wt_wtAhead	25	leading-trailing interface	19.828	0.752	0.847
wt_wtAhead	25	leading-trailing interface	22.412	0.85	0.958
wt_wtAhead	25	leading-trailing interface	23.268	0.883	0.994
wt_wtAhead	25	leading-trailing interface	19.532	0.741	0.835
wt_wtAhead	25	leading-trailing interface	22.849	0.867	0.976
wt_wtAhead	25	leading-trailing interface	25.233	0.957	1.078
wt_wtAhead	25	leading-trailing interface	22.56	0.856	0.964
wt_wtAhead	25	leading-trailing interface	28.237	1.071	1.207
fat2_fat2Ahead	1	leading-trailing interface	18.82	0.714	0.862
fat2_fat2Ahead	1	leading-trailing interface	15.657	0.594	0.717
fat2_fat2Ahead	1	leading-trailing interface	17.107	0.649	0.784
fat2_fat2Ahead	1	leading-trailing interface	19.269	0.731	0.883
fat2_fat2Ahead	1	leading-trailing interface	16.203	0.615	0.742
fat2_fat2Ahead	2	leading-trailing interface	17.842	0.677	0.856
fat2_fat2Ahead	2	leading-trailing interface	21.955	0.833	1.053
fat2_fat2Ahead	2	leading-trailing interface	18.802	0.713	0.902
fat2_fat2Ahead	2	leading-trailing interface	17.93	0.68	0.86
fat2_fat2Ahead	2	leading-trailing interface	15.609	0.592	0.749
fat2_fat2Ahead	2	leading-trailing interface	13.934	0.529	0.668
fat2_fat2Ahead	3	leading-trailing interface	21.903	0.831	0.819
fat2_fat2Ahead	3	leading-trailing interface	24.575	0.932	0.919
fat2_fat2Ahead	3	leading-trailing interface	24.622	0.934	0.921
fat2_fat2Ahead	3	leading-trailing interface	21.005	0.797	0.785
fat2_fat2Ahead	3	leading-trailing interface	25.771	0.978	0.964
fat2_fat2Ahead	3	leading-trailing interface	25.698	0.975	0.961
fat2_fat2Ahead	3	leading-trailing interface	20.856	0.791	0.78
fat2_fat2Ahead	3	leading-trailing interface	18.269	0.693	0.683
fat2_fat2Ahead	3	leading-trailing interface	25.065	0.951	0.937
fat2_fat2Ahead	3	leading-trailing interface	18.498	0.702	0.692
fat2_fat2Ahead	3	leading-trailing interface	23.044	0.874	0.862
fat2_fat2Ahead	4	leading-trailing interface	17.613	0.668	0.721
fat2_fat2Ahead	4	leading-trailing interface	18.08	0.686	0.74
fat2_fat2Ahead	4	leading-trailing interface	18.317	0.695	0.75
fat2_fat2Ahead	4	leading-trailing interface	24.257	0.92	0.993
fat2_fat2Ahead	4	leading-trailing interface	16.328	0.62	0.669
fat2_fat2Ahead	5	leading-trailing interface	21.775	0.826	0.883
fat2_fat2Ahead	5	leading-trailing interface	22.653	0.86	0.918
fat2_fat2Ahead	5	leading-trailing interface	19.533	0.741	0.792
fat2_fat2Ahead	5	leading-trailing interface	18.074	0.686	0.733
fat2_fat2Ahead	5	leading-trailing interface	21.446	0.814	0.869
fat2_fat2Ahead	5	leading-trailing interface	20.263	0.769	0.821
fat2_fat2Ahead	5	leading-trailing interface	21.48	0.815	0.871
fat2_fat2Ahead	5	leading-trailing interface	21.434	0.813	0.869
fat2_fat2Ahead	5	leading-trailing interface	17.58	0.667	0.713
fat2_fat2Ahead	5	leading-trailing interface	21.786	0.827	0.883
fat2_fat2Ahead	5	leading-trailing interface	20.044	0.761	0.812
fat2_fat2Ahead	5	leading-trailing interface	17.489	0.664	0.709
fat2_fat2Ahead	5	leading-trailing interface	21.664	0.822	0.878
fat2_fat2Ahead	6	leading-trailing interface	19.281	0.732	0.739
fat2_fat2Ahead	6	leading-trailing interface	19.473	0.739	0.746
fat2_fat2Ahead	6	leading-trailing interface	22.676	0.86	0.869
fat2_fat2Ahead	6	leading-trailing interface	25.251	0.958	0.968
fat2_fat2Ahead	6	leading-trailing interface	22.91	0.869	0.878
fat2_fat2Ahead	6	leading-trailing interface	14.469	0.549	0.555
fat2_fat2Ahead	6	leading-trailing interface	19.581	0.743	0.751
fat2_fat2Ahead	6	leading-trailing interface	16.591	0.63	0.636
fat2_fat2Ahead	6	leading-trailing interface	25.583	0.971	0.981
fat2_fat2Ahead	6	leading-trailing interface	22.471	0.853	0.861
fat2_fat2Ahead	6	leading-trailing interface	21.614	0.82	0.828
fat2_fat2Ahead	6	leading-trailing interface	19.669	0.746	0.754
fat2_fat2Ahead	6	leading-trailing interface	24.188	0.918	0.927
fat2_fat2Ahead	6	leading-trailing interface	22.796	0.865	0.874
fat2_fat2Ahead	6	leading-trailing interface	20.295	0.77	0.778
fat2_fat2Ahead	8	leading-trailing interface	25.552	0.97	0.9
fat2_fat2Ahead	8	leading-trailing interface	22.625	0.858	0.797
fat2_fat2Ahead	8	leading-trailing interface	20.395	0.774	0.719
fat2_fat2Ahead	8	leading-trailing interface	18.414	0.699	0.649
fat2_fat2Ahead	8	leading-trailing interface	17.936	0.681	0.632
fat2_fat2Ahead	8	leading-trailing interface	22.077	0.838	0.778
fat2_fat2Ahead	8	leading-trailing interface	21.215	0.805	0.747
fat2_fat2Ahead	9	leading-trailing interface	26.376	1.001	0.955
fat2_fat2Ahead	9	leading-trailing interface	21.428	0.813	0.776
fat2_fat2Ahead	9	leading-trailing interface	30.758	1.167	1.114
fat2_fat2Ahead	9	leading-trailing interface	19.168	0.727	0.694
fat2_fat2Ahead	9	leading-trailing interface	24.605	0.934	0.891
fat2_fat2Ahead	9	leading-trailing interface	27.189	1.032	0.985
fat2_fat2Ahead	9	leading-trailing interface	20.534	0.779	0.744
fat2_fat2Ahead	9	leading-trailing interface	23.053	0.875	0.835
fat2_fat2Ahead	9	leading-trailing interface	30.094	1.142	1.09
fat2_fat2Ahead	9	leading-trailing interface	29.062	1.103	1.053
fat2_fat2Ahead	9	leading-trailing interface	22.262	0.845	0.806
fat2_fat2Ahead	9	leading-trailing interface	24.315	0.923	0.881
fat2_fat2Ahead	9	leading-trailing interface	21.391	0.812	0.775
fat2_fat2Ahead	9	leading-trailing interface	27.657	1.049	1.002
fat2_fat2Ahead	11	leading-trailing interface	25.356	0.962	0.784
fat2_fat2Ahead	11	leading-trailing interface	17.486	0.663	0.541
fat2_fat2Ahead	11	leading-trailing interface	19.382	0.735	0.599
fat2_fat2Ahead	11	leading-trailing interface	20.941	0.795	0.648
fat2_fat2Ahead	11	leading-trailing interface	22.831	0.866	0.706
fat2_fat2Ahead	12	leading-trailing interface	30.242	1.148	1.145
fat2_fat2Ahead	12	leading-trailing interface	23.083	0.876	0.874
fat2_fat2Ahead	12	leading-trailing interface	27.417	1.04	1.038
fat2_fat2Ahead	12	leading-trailing interface	25.559	0.97	0.967
fat2_fat2Ahead	12	leading-trailing interface	25.888	0.982	0.98
fat2_fat2Ahead	12	leading-trailing interface	20.313	0.771	0.769
fat2_fat2Ahead	12	leading-trailing interface	18.163	0.689	0.687
fat2_fat2Ahead	12	leading-trailing interface	19.198	0.728	0.727
fat2_fat2Ahead	12	leading-trailing interface	21.161	0.803	0.801
fat2_fat2Ahead	12	leading-trailing interface	21.942	0.833	0.83
fat2_fat2Ahead	12	leading-trailing interface	20.115	0.763	0.761
fat2_fat2Ahead	12	leading-trailing interface	26.287	0.997	0.995
fat2_fat2Ahead	14	leading-trailing interface	18.407	0.698	0.778
fat2_fat2Ahead	14	leading-trailing interface	18.998	0.721	0.803
fat2_fat2Ahead	14	leading-trailing interface	21.799	0.827	0.921
fat2_fat2Ahead	14	leading-trailing interface	19.29	0.732	0.815
fat2_fat2Ahead	14	leading-trailing interface	14.829	0.563	0.627
fat2_fat2Ahead	14	leading-trailing interface	22.295	0.846	0.942
fat2_fat2Ahead	14	leading-trailing interface	18.327	0.695	0.775
fat2_fat2Ahead	14	leading-trailing interface	22.404	0.85	0.947
fat2_fat2Ahead	15	leading-trailing interface	30.493	1.157	0.932
fat2_fat2Ahead	15	leading-trailing interface	34.274	1.3	1.047
fat2_fat2Ahead	15	leading-trailing interface	27.376	1.039	0.836
fat2_fat2Ahead	15	leading-trailing interface	25.712	0.976	0.786
fat2_fat2Ahead	15	leading-trailing interface	23.455	0.89	0.717
fat2_fat2Ahead	15	leading-trailing interface	26.445	1.003	0.808
fat2_fat2Ahead	15	leading-trailing interface	28.018	1.063	0.856
fat2_fat2Ahead	15	leading-trailing interface	23.489	0.891	0.718
fat2_fat2Ahead	15	leading-trailing interface	19.496	0.74	0.596
fat2_fat2Ahead	15	leading-trailing interface	29.341	1.113	0.896
fat2_fat2Ahead	15	leading-trailing interface	26.792	1.017	0.819
fat2_fat2Ahead	15	leading-trailing interface	27.347	1.038	0.835
fat2_fat2Ahead	16	leading-trailing interface	22.444	0.852	0.83
fat2_fat2Ahead	16	leading-trailing interface	17.247	0.654	0.638
fat2_fat2Ahead	16	leading-trailing interface	24.516	0.93	0.907
fat2_fat2Ahead	16	leading-trailing interface	26.547	1.007	0.982
fat2_fat2Ahead	16	leading-trailing interface	24.533	0.931	0.907
fat2_fat2Ahead	16	leading-trailing interface	30.064	1.141	1.112
fat2_fat2Ahead	16	leading-trailing interface	22.573	0.857	0.835
fat2_fat2Ahead	16	leading-trailing interface	27.332	1.037	1.011
fat2_fat2Ahead	16	leading-trailing interface	27.309	1.036	1.01
fat2_fat2Ahead	16	leading-trailing interface	24.711	0.938	0.914
fat2_fat2Ahead	16	leading-trailing interface	26.422	1.003	0.977
fat2_fat2Ahead	16	leading-trailing interface	21.228	0.805	0.785
fat2_fat2Ahead	16	leading-trailing interface	26.397	1.002	0.976
fat2_fat2Ahead	16	leading-trailing interface	21.855	0.829	0.808
fat2_fat2Ahead	16	leading-trailing interface	19.633	0.745	0.726
fat2_fat2Ahead	16	leading-trailing interface	24.76	0.939	0.916
fat2_fat2Ahead	16	leading-trailing interface	20.441	0.776	0.756
fat2_fat2Ahead	17	leading-trailing interface	21.095	0.8	0.73
fat2_fat2Ahead	17	leading-trailing interface	23.931	0.908	0.828
fat2_fat2Ahead	17	leading-trailing interface	22.266	0.845	0.77
fat2_fat2Ahead	17	leading-trailing interface	23.695	0.899	0.82
fat2_fat2Ahead	17	leading-trailing interface	20.389	0.774	0.705
fat2_fat2Ahead	17	leading-trailing interface	22.212	0.843	0.768
fat2_fat2Ahead	17	leading-trailing interface	20.862	0.792	0.722
fat2_fat2Ahead	17	leading-trailing interface	29.313	1.112	1.014
fat2_fat2Ahead	17	leading-trailing interface	26.719	1.014	0.924
fat2_fat2Ahead	17	leading-trailing interface	23.555	0.894	0.815
fat2_fat2Ahead	17	leading-trailing interface	22.379	0.849	0.774
fat2_fat2Ahead	17	leading-trailing interface	23.434	0.889	0.811
fat2_fat2Ahead	17	leading-trailing interface	25.867	0.981	0.895
fat2_fat2Ahead	18	leading-trailing interface	24.422	0.927	0.898
fat2_fat2Ahead	18	leading-trailing interface	24.769	0.94	0.911
fat2_fat2Ahead	18	leading-trailing interface	28.917	1.097	1.063
fat2_fat2Ahead	18	leading-trailing interface	20.595	0.781	0.757
fat2_fat2Ahead	18	leading-trailing interface	23.97	0.91	0.881
fat2_fat2Ahead	18	leading-trailing interface	23.114	0.877	0.85
fat2_fat2Ahead	18	leading-trailing interface	23.843	0.905	0.877
fat2_fat2Ahead	18	leading-trailing interface	27.961	1.061	1.028
fat2_fat2Ahead	19	leading-trailing interface	23.413	0.888	0.975
fat2_fat2Ahead	19	leading-trailing interface	23.353	0.886	0.972
fat2_fat2Ahead	19	leading-trailing interface	18.985	0.72	0.79
fat2_fat2Ahead	19	leading-trailing interface	19.971	0.758	0.831
fat2_fat2Ahead	19	leading-trailing interface	25.494	0.967	1.061
fat2_fat2Ahead	19	leading-trailing interface	20.636	0.783	0.859
fat2_fat2Ahead	19	leading-trailing interface	20.765	0.788	0.864
fat2_fat2Ahead	19	leading-trailing interface	25.236	0.958	1.05
fat2_fat2Ahead	19	leading-trailing interface	25.949	0.985	1.08
fat2_fat2Ahead	19	leading-trailing interface	20.775	0.788	0.865
fat2_fat2Ahead	19	leading-trailing interface	18.585	0.705	0.774
fat2_fat2Ahead	19	leading-trailing interface	19.822	0.752	0.825
fat2_fat2Ahead	20	leading-trailing interface	22.912	0.869	0.865
fat2_fat2Ahead	20	leading-trailing interface	18.324	0.695	0.692
fat2_fat2Ahead	20	leading-trailing interface	17.783	0.675	0.671
fat2_fat2Ahead	20	leading-trailing interface	21.011	0.797	0.793
fat2_fat2Ahead	20	leading-trailing interface	27.965	1.061	1.055
fat2_fat2Ahead	20	leading-trailing interface	23.74	0.901	0.896
fat2_fat2Ahead	20	leading-trailing interface	19.778	0.75	0.746
fat2_fat2Ahead	20	leading-trailing interface	19.271	0.731	0.727
fat2_fat2Ahead	20	leading-trailing interface	18.769	0.712	0.708
fat2_fat2Ahead	20	leading-trailing interface	22.123	0.839	0.835
fat2_fat2Ahead	20	leading-trailing interface	21.02	0.798	0.793
fat2_fat2Ahead	20	leading-trailing interface	21.641	0.821	0.817
fat2_fat2Ahead	20	leading-trailing interface	20.127	0.764	0.76
fat2_fat2Ahead	20	leading-trailing interface	20.788	0.789	0.785
fat2_fat2Ahead	20	leading-trailing interface	20.828	0.79	0.786
fat2_fat2Ahead	20	leading-trailing interface	23.57	0.894	0.89
fat2_fat2Ahead	21	leading-trailing interface	18.495	0.702	0.838
fat2_fat2Ahead	21	leading-trailing interface	22.925	0.87	1.039
fat2_fat2Ahead	21	leading-trailing interface	17.341	0.658	0.786
fat2_fat2Ahead	21	leading-trailing interface	21.367	0.811	0.968
fat2_fat2Ahead	21	leading-trailing interface	21.745	0.825	0.985
fat2_fat2Ahead	21	leading-trailing interface	18.732	0.711	0.849
fat2_fat2Ahead	21	leading-trailing interface	14.159	0.537	0.641
fat2_fat2Ahead	21	leading-trailing interface	12.45	0.472	0.564
fat2_fat2Ahead	21	leading-trailing interface	15.256	0.579	0.691
fat2_fat2Ahead	21	leading-trailing interface	13.849	0.525	0.627
fat2_fat2Ahead	21	leading-trailing interface	17.618	0.668	0.798
fat2_fat2Ahead	21	leading-trailing interface	17.1	0.649	0.775
fat2_fat2Ahead	21	leading-trailing interface	17.463	0.663	0.791
fat2_fat2Ahead	23	leading-trailing interface	23.132	0.878	0.817
fat2_fat2Ahead	23	leading-trailing interface	25.77	0.978	0.91
fat2_fat2Ahead	23	leading-trailing interface	24.028	0.912	0.849
fat2_fat2Ahead	23	leading-trailing interface	21.78	0.826	0.769
fat2_fat2Ahead	23	leading-trailing interface	20.91	0.793	0.738
fat2_fat2Ahead	23	leading-trailing interface	23.7	0.899	0.837
fat2_fat2Ahead	23	leading-trailing interface	21.615	0.82	0.763
fat2_fat2Ahead	23	leading-trailing interface	20.085	0.762	0.709
fat2_fat2Ahead	23	leading-trailing interface	23.757	0.901	0.839
fat2_fat2Ahead	23	leading-trailing interface	20.373	0.773	0.719
fat2_fat2Ahead	24	leading-trailing interface	24.316	0.923	0.793
fat2_fat2Ahead	24	leading-trailing interface	29.266	1.11	0.954
fat2_fat2Ahead	24	leading-trailing interface	24.872	0.944	0.811
fat2_fat2Ahead	24	leading-trailing interface	20.022	0.76	0.653
fat2_fat2Ahead	24	leading-trailing interface	24.239	0.92	0.79
fat2_fat2Ahead	24	leading-trailing interface	20.412	0.775	0.666
fat2_fat2Ahead	24	leading-trailing interface	22.507	0.854	0.734
fat2_fat2Ahead	24	leading-trailing interface	21.754	0.825	0.709
fat2_fat2Ahead	24	leading-trailing interface	27.063	1.027	0.882
fat2_fat2Ahead	24	leading-trailing interface	34.331	1.303	1.119
fat2_fat2Ahead	24	leading-trailing interface	25.912	0.983	0.845
fat2_fat2Ahead	24	leading-trailing interface	24.83	0.942	0.81
fat2_fat2Ahead	24	leading-trailing interface	27.093	1.028	0.883
fat2_fat2Ahead	24	leading-trailing interface	25.034	0.95	0.816
fat2_fat2Ahead	24	leading-trailing interface	23.67	0.898	0.772
fat2_fat2Ahead	24	leading-trailing interface	21.812	0.828	0.711
fat2_fat2Ahead	25	leading-trailing interface	26.494	1.005	1.132
fat2_fat2Ahead	25	leading-trailing interface	24.135	0.916	1.031
fat2_fat2Ahead	25	leading-trailing interface	21.881	0.83	0.935
fat2_fat2Ahead	25	leading-trailing interface	24.52	0.93	1.048
fat2_fat2Ahead	25	leading-trailing interface	20.499	0.778	0.876
fat2_fat2Ahead	25	leading-trailing interface	21.509	0.816	0.919
fat2_fat2Ahead	25	leading-trailing interface	21.34	0.81	0.912
fat2_fat2Ahead	25	leading-trailing interface	20.458	0.776	0.874
fat2_fat2Ahead	25	leading-trailing interface	18.141	0.688	0.775
fat2_fat2Ahead	25	leading-trailing interface	23.572	0.894	1.007
fat2_fat2Ahead	25	leading-trailing interface	17.262	0.655	0.738
fat2_fat2Ahead	25	leading-trailing interface	16.505	0.626	0.705
fat2_wtAhead	1	leading-trailing interface	26.774	1.016	1.227
fat2_wtAhead	1	leading-trailing interface	20.841	0.791	0.955
fat2_wtAhead	1	leading-trailing interface	24.827	0.942	1.138
fat2_wtAhead	1	leading-trailing interface	19.532	0.741	0.895
fat2_wtAhead	2	leading-trailing interface	22.065	0.837	1.058
fat2_wtAhead	2	leading-trailing interface	20.519	0.779	0.984
fat2_wtAhead	2	leading-trailing interface	20.188	0.766	0.968
fat2_wtAhead	2	leading-trailing interface	28.214	1.071	1.353
fat2_wtAhead	2	leading-trailing interface	29.024	1.101	1.392
fat2_wtAhead	2	leading-trailing interface	26.013	0.987	1.248
fat2_wtAhead	2	leading-trailing interface	26.363	1	1.265
fat2_wtAhead	2	leading-trailing interface	21.157	0.803	1.015
fat2_wtAhead	2	leading-trailing interface	16.524	0.627	0.793
fat2_wtAhead	3	leading-trailing interface	25.316	0.961	0.947
fat2_wtAhead	3	leading-trailing interface	25.858	0.981	0.967
fat2_wtAhead	3	leading-trailing interface	21.755	0.825	0.813
fat2_wtAhead	3	leading-trailing interface	26.933	1.022	1.007
fat2_wtAhead	3	leading-trailing interface	19.997	0.759	0.748
fat2_wtAhead	3	leading-trailing interface	20.169	0.765	0.754
fat2_wtAhead	3	leading-trailing interface	21.617	0.82	0.808
fat2_wtAhead	3	leading-trailing interface	35.675	1.354	1.334
fat2_wtAhead	3	leading-trailing interface	40.347	1.531	1.509
fat2_wtAhead	4	leading-trailing interface	22.668	0.86	0.928
fat2_wtAhead	4	leading-trailing interface	22.692	0.861	0.929
fat2_wtAhead	4	leading-trailing interface	18.752	0.712	0.768
fat2_wtAhead	4	leading-trailing interface	18.659	0.708	0.764
fat2_wtAhead	4	leading-trailing interface	18.838	0.715	0.771
fat2_wtAhead	4	leading-trailing interface	18.204	0.691	0.745
fat2_wtAhead	5	leading-trailing interface	24.512	0.93	0.993
fat2_wtAhead	5	leading-trailing interface	22.28	0.845	0.903
fat2_wtAhead	5	leading-trailing interface	25.815	0.98	1.046
fat2_wtAhead	5	leading-trailing interface	27.483	1.043	1.114
fat2_wtAhead	5	leading-trailing interface	26.83	1.018	1.087
fat2_wtAhead	5	leading-trailing interface	22.92	0.87	0.929
fat2_wtAhead	5	leading-trailing interface	27.447	1.041	1.112
fat2_wtAhead	5	leading-trailing interface	23.066	0.875	0.935
fat2_wtAhead	5	leading-trailing interface	23.201	0.88	0.94
fat2_wtAhead	5	leading-trailing interface	28.724	1.09	1.164
fat2_wtAhead	5	leading-trailing interface	25.447	0.966	1.031
fat2_wtAhead	5	leading-trailing interface	27.609	1.048	1.119
fat2_wtAhead	5	leading-trailing interface	30.535	1.159	1.238
fat2_wtAhead	5	leading-trailing interface	21.746	0.825	0.881
fat2_wtAhead	5	leading-trailing interface	21.611	0.82	0.876
fat2_wtAhead	6	leading-trailing interface	36.541	1.387	1.401
fat2_wtAhead	6	leading-trailing interface	29.103	1.104	1.116
fat2_wtAhead	6	leading-trailing interface	27.573	1.046	1.057
fat2_wtAhead	6	leading-trailing interface	18.038	0.684	0.691
fat2_wtAhead	6	leading-trailing interface	20.623	0.783	0.79
fat2_wtAhead	6	leading-trailing interface	33.7	1.279	1.292
fat2_wtAhead	6	leading-trailing interface	18.315	0.695	0.702
fat2_wtAhead	6	leading-trailing interface	17.765	0.674	0.681
fat2_wtAhead	6	leading-trailing interface	24.159	0.917	0.926
fat2_wtAhead	6	leading-trailing interface	32.782	1.244	1.257
fat2_wtAhead	6	leading-trailing interface	21.366	0.811	0.819
fat2_wtAhead	8	leading-trailing interface	31.445	1.193	1.108
fat2_wtAhead	8	leading-trailing interface	28.507	1.082	1.004
fat2_wtAhead	8	leading-trailing interface	32.788	1.244	1.155
fat2_wtAhead	8	leading-trailing interface	23.822	0.904	0.839
fat2_wtAhead	8	leading-trailing interface	29.013	1.101	1.022
fat2_wtAhead	8	leading-trailing interface	35.382	1.343	1.247
fat2_wtAhead	8	leading-trailing interface	22.84	0.867	0.805
fat2_wtAhead	8	leading-trailing interface	20.41	0.774	0.719
fat2_wtAhead	9	leading-trailing interface	29.183	1.107	1.057
fat2_wtAhead	9	leading-trailing interface	21.69	0.823	0.786
fat2_wtAhead	9	leading-trailing interface	33.141	1.258	1.2
fat2_wtAhead	9	leading-trailing interface	24.941	0.946	0.903
fat2_wtAhead	9	leading-trailing interface	29.781	1.13	1.079
fat2_wtAhead	9	leading-trailing interface	22.679	0.861	0.821
fat2_wtAhead	11	leading-trailing interface	23.688	0.899	0.733
fat2_wtAhead	11	leading-trailing interface	23.725	0.9	0.734
fat2_wtAhead	11	leading-trailing interface	31.429	1.193	0.972
fat2_wtAhead	11	leading-trailing interface	32.228	1.223	0.997
fat2_wtAhead	11	leading-trailing interface	33.422	1.268	1.034
fat2_wtAhead	11	leading-trailing interface	34.731	1.318	1.074
fat2_wtAhead	11	leading-trailing interface	27.858	1.057	0.862
fat2_wtAhead	11	leading-trailing interface	27.858	1.057	0.862
fat2_wtAhead	11	leading-trailing interface	32.31	1.226	0.999
fat2_wtAhead	12	leading-trailing interface	28.703	1.089	1.086
fat2_wtAhead	12	leading-trailing interface	34.472	1.308	1.305
fat2_wtAhead	12	leading-trailing interface	25.252	0.958	0.956
fat2_wtAhead	12	leading-trailing interface	30.271	1.149	1.146
fat2_wtAhead	12	leading-trailing interface	31.344	1.189	1.186
fat2_wtAhead	12	leading-trailing interface	25.133	0.954	0.951
fat2_wtAhead	12	leading-trailing interface	24.205	0.918	0.916
fat2_wtAhead	12	leading-trailing interface	25.591	0.971	0.969
fat2_wtAhead	12	leading-trailing interface	24.549	0.931	0.929
fat2_wtAhead	12	leading-trailing interface	34.208	1.298	1.295
fat2_wtAhead	12	leading-trailing interface	27.298	1.036	1.033
fat2_wtAhead	12	leading-trailing interface	26.033	0.988	0.985
fat2_wtAhead	12	leading-trailing interface	21.446	0.814	0.812
fat2_wtAhead	14	leading-trailing interface	24.891	0.944	1.052
fat2_wtAhead	14	leading-trailing interface	18.15	0.689	0.767
fat2_wtAhead	14	leading-trailing interface	26.18	0.993	1.107
fat2_wtAhead	15	leading-trailing interface	31.69	1.202	0.968
fat2_wtAhead	15	leading-trailing interface	39.421	1.496	1.204
fat2_wtAhead	15	leading-trailing interface	33.589	1.275	1.026
fat2_wtAhead	16	leading-trailing interface	26.989	1.024	0.998
fat2_wtAhead	16	leading-trailing interface	22.496	0.854	0.832
fat2_wtAhead	16	leading-trailing interface	29.541	1.121	1.093
fat2_wtAhead	16	leading-trailing interface	26.374	1.001	0.975
fat2_wtAhead	16	leading-trailing interface	26.636	1.011	0.985
fat2_wtAhead	16	leading-trailing interface	29.955	1.137	1.108
fat2_wtAhead	16	leading-trailing interface	27.824	1.056	1.029
fat2_wtAhead	16	leading-trailing interface	21.849	0.829	0.808
fat2_wtAhead	16	leading-trailing interface	29.142	1.106	1.078
fat2_wtAhead	16	leading-trailing interface	28.708	1.089	1.062
fat2_wtAhead	16	leading-trailing interface	28.371	1.077	1.049
fat2_wtAhead	17	leading-trailing interface	33.43	1.268	1.156
fat2_wtAhead	17	leading-trailing interface	25.571	0.97	0.885
fat2_wtAhead	17	leading-trailing interface	35.939	1.364	1.243
fat2_wtAhead	17	leading-trailing interface	32.717	1.241	1.132
fat2_wtAhead	17	leading-trailing interface	34.186	1.297	1.183
fat2_wtAhead	17	leading-trailing interface	24.717	0.938	0.855
fat2_wtAhead	17	leading-trailing interface	32.124	1.219	1.111
fat2_wtAhead	17	leading-trailing interface	29.436	1.117	1.018
fat2_wtAhead	17	leading-trailing interface	27.219	1.033	0.942
fat2_wtAhead	17	leading-trailing interface	39.981	1.517	1.383
fat2_wtAhead	17	leading-trailing interface	20.634	0.783	0.714
fat2_wtAhead	17	leading-trailing interface	32.088	1.218	1.11
fat2_wtAhead	17	leading-trailing interface	23.517	0.892	0.814
fat2_wtAhead	18	leading-trailing interface	30.907	1.173	1.136
fat2_wtAhead	18	leading-trailing interface	31.828	1.208	1.17
fat2_wtAhead	18	leading-trailing interface	25.151	0.954	0.925
fat2_wtAhead	18	leading-trailing interface	20.372	0.773	0.749
fat2_wtAhead	18	leading-trailing interface	27.853	1.057	1.024
fat2_wtAhead	18	leading-trailing interface	27.81	1.055	1.022
fat2_wtAhead	18	leading-trailing interface	26.619	1.01	0.979
fat2_wtAhead	19	leading-trailing interface	28.376	1.077	1.181
fat2_wtAhead	19	leading-trailing interface	21.487	0.815	0.894
fat2_wtAhead	19	leading-trailing interface	27.416	1.04	1.141
fat2_wtAhead	19	leading-trailing interface	26.244	0.996	1.092
fat2_wtAhead	19	leading-trailing interface	20.791	0.789	0.865
fat2_wtAhead	19	leading-trailing interface	21.767	0.826	0.906
fat2_wtAhead	20	leading-trailing interface	34.467	1.308	1.301
fat2_wtAhead	20	leading-trailing interface	34.563	1.311	1.304
fat2_wtAhead	20	leading-trailing interface	22.649	0.859	0.855
fat2_wtAhead	20	leading-trailing interface	22.624	0.858	0.854
fat2_wtAhead	20	leading-trailing interface	30.135	1.143	1.137
fat2_wtAhead	20	leading-trailing interface	28.666	1.088	1.082
fat2_wtAhead	20	leading-trailing interface	22.484	0.853	0.849
fat2_wtAhead	20	leading-trailing interface	31.984	1.214	1.207
fat2_wtAhead	20	leading-trailing interface	26.18	0.993	0.988
fat2_wtAhead	20	leading-trailing interface	22.226	0.843	0.839
fat2_wtAhead	20	leading-trailing interface	20.983	0.796	0.792
fat2_wtAhead	20	leading-trailing interface	26.398	1.002	0.996
fat2_wtAhead	21	leading-trailing interface	24.804	0.941	1.124
fat2_wtAhead	21	leading-trailing interface	20.63	0.783	0.935
fat2_wtAhead	21	leading-trailing interface	20.88	0.792	0.946
fat2_wtAhead	21	leading-trailing interface	20.095	0.762	0.91
fat2_wtAhead	21	leading-trailing interface	17.536	0.665	0.794
fat2_wtAhead	21	leading-trailing interface	22.738	0.863	1.03
fat2_wtAhead	21	leading-trailing interface	21.186	0.804	0.96
fat2_wtAhead	21	leading-trailing interface	25.833	0.98	1.17
fat2_wtAhead	21	leading-trailing interface	18.255	0.693	0.827
fat2_wtAhead	21	leading-trailing interface	19.848	0.753	0.899
fat2_wtAhead	21	leading-trailing interface	25.504	0.968	1.155
fat2_wtAhead	21	leading-trailing interface	17.288	0.656	0.783
fat2_wtAhead	21	leading-trailing interface	16.617	0.631	0.753
fat2_wtAhead	21	leading-trailing interface	19.701	0.748	0.893
fat2_wtAhead	21	leading-trailing interface	23.171	0.879	1.05
fat2_wtAhead	21	leading-trailing interface	21.646	0.821	0.981
fat2_wtAhead	23	leading-trailing interface	37.091	1.407	1.31
fat2_wtAhead	23	leading-trailing interface	26.768	1.016	0.945
fat2_wtAhead	23	leading-trailing interface	32.834	1.246	1.159
fat2_wtAhead	23	leading-trailing interface	33.365	1.266	1.178
fat2_wtAhead	23	leading-trailing interface	34.438	1.307	1.216
fat2_wtAhead	23	leading-trailing interface	18.153	0.689	0.641
fat2_wtAhead	24	leading-trailing interface	38.584	1.464	1.258
fat2_wtAhead	24	leading-trailing interface	37.559	1.425	1.225
fat2_wtAhead	24	leading-trailing interface	20.902	0.793	0.681
fat2_wtAhead	24	leading-trailing interface	24.444	0.928	0.797
fat2_wtAhead	24	leading-trailing interface	25.763	0.978	0.84
fat2_wtAhead	24	leading-trailing interface	30.311	1.15	0.988
fat2_wtAhead	24	leading-trailing interface	39.664	1.505	1.293
fat2_wtAhead	24	leading-trailing interface	29.212	1.108	0.952
fat2_wtAhead	24	leading-trailing interface	34.338	1.303	1.12
fat2_wtAhead	24	leading-trailing interface	29.091	1.104	0.948
fat2_wtAhead	25	leading-trailing interface	19.793	0.751	0.846
fat2_wtAhead	25	leading-trailing interface	20.077	0.762	0.858
fat2_wtAhead	25	leading-trailing interface	20.801	0.789	0.889
fat2_wtAhead	25	leading-trailing interface	21.452	0.814	0.917
fat2_wtAhead	25	leading-trailing interface	19.534	0.741	0.835
fat2_wtAhead	25	leading-trailing interface	16.696	0.634	0.714
fat2_wtAhead	25	leading-trailing interface	23.924	0.908	1.022
wt_fat2Ahead	1	leading-trailing interface	15.846	0.601	0.726
wt_fat2Ahead	1	leading-trailing interface	18.887	0.717	0.865
wt_fat2Ahead	1	leading-trailing interface	19.036	0.722	0.872
wt_fat2Ahead	1	leading-trailing interface	18.529	0.703	0.849
wt_fat2Ahead	2	leading-trailing interface	12.242	0.465	0.587
wt_fat2Ahead	2	leading-trailing interface	17.461	0.663	0.838
wt_fat2Ahead	2	leading-trailing interface	15.667	0.594	0.752
wt_fat2Ahead	2	leading-trailing interface	17.501	0.664	0.84
wt_fat2Ahead	2	leading-trailing interface	12.697	0.482	0.609
wt_fat2Ahead	2	leading-trailing interface	14.29	0.542	0.686
wt_fat2Ahead	2	leading-trailing interface	13.548	0.514	0.65
wt_fat2Ahead	3	leading-trailing interface	19.544	0.742	0.731
wt_fat2Ahead	3	leading-trailing interface	21.996	0.835	0.822
wt_fat2Ahead	3	leading-trailing interface	17.661	0.67	0.66
wt_fat2Ahead	3	leading-trailing interface	15.734	0.597	0.588
wt_fat2Ahead	3	leading-trailing interface	27.546	1.045	1.03
wt_fat2Ahead	3	leading-trailing interface	23.235	0.882	0.869
wt_fat2Ahead	3	leading-trailing interface	16.429	0.623	0.614
wt_fat2Ahead	4	leading-trailing interface	19.071	0.724	0.781
wt_fat2Ahead	4	leading-trailing interface	16.603	0.63	0.68
wt_fat2Ahead	4	leading-trailing interface	19.185	0.728	0.786
wt_fat2Ahead	4	leading-trailing interface	19.041	0.722	0.78
wt_fat2Ahead	5	leading-trailing interface	19.017	0.722	0.771
wt_fat2Ahead	5	leading-trailing interface	20.426	0.775	0.828
wt_fat2Ahead	5	leading-trailing interface	16.283	0.618	0.66
wt_fat2Ahead	5	leading-trailing interface	15.382	0.584	0.623
wt_fat2Ahead	5	leading-trailing interface	19.344	0.734	0.784
wt_fat2Ahead	5	leading-trailing interface	15.712	0.596	0.637
wt_fat2Ahead	5	leading-trailing interface	17.169	0.651	0.696
wt_fat2Ahead	5	leading-trailing interface	19.866	0.754	0.805
wt_fat2Ahead	6	leading-trailing interface	21.709	0.824	0.832
wt_fat2Ahead	6	leading-trailing interface	15.317	0.581	0.587
wt_fat2Ahead	6	leading-trailing interface	14.151	0.537	0.542
wt_fat2Ahead	6	leading-trailing interface	16.727	0.635	0.641
wt_fat2Ahead	6	leading-trailing interface	15.715	0.596	0.602
wt_fat2Ahead	6	leading-trailing interface	18.918	0.718	0.725
wt_fat2Ahead	6	leading-trailing interface	16.52	0.627	0.633
wt_fat2Ahead	6	leading-trailing interface	16.159	0.613	0.619
wt_fat2Ahead	6	leading-trailing interface	15.959	0.606	0.612
wt_fat2Ahead	6	leading-trailing interface	15.979	0.606	0.612
wt_fat2Ahead	6	leading-trailing interface	17.016	0.646	0.652
wt_fat2Ahead	8	leading-trailing interface	20.616	0.782	0.726
wt_fat2Ahead	8	leading-trailing interface	20.173	0.765	0.711
wt_fat2Ahead	8	leading-trailing interface	15.575	0.591	0.549
wt_fat2Ahead	8	leading-trailing interface	20.153	0.765	0.71
wt_fat2Ahead	8	leading-trailing interface	20.682	0.785	0.729
wt_fat2Ahead	8	leading-trailing interface	18.87	0.716	0.665
wt_fat2Ahead	8	leading-trailing interface	24.176	0.917	0.852
wt_fat2Ahead	8	leading-trailing interface	17.644	0.669	0.622
wt_fat2Ahead	8	leading-trailing interface	14.83	0.563	0.523
wt_fat2Ahead	8	leading-trailing interface	21.59	0.819	0.761
wt_fat2Ahead	8	leading-trailing interface	21.79	0.827	0.768
wt_fat2Ahead	9	leading-trailing interface	22.393	0.85	0.811
wt_fat2Ahead	9	leading-trailing interface	27.794	1.055	1.007
wt_fat2Ahead	9	leading-trailing interface	19.065	0.723	0.691
wt_fat2Ahead	9	leading-trailing interface	27.471	1.042	0.995
wt_fat2Ahead	11	leading-trailing interface	14.224	0.54	0.44
wt_fat2Ahead	11	leading-trailing interface	16.193	0.614	0.501
wt_fat2Ahead	11	leading-trailing interface	17.96	0.681	0.555
wt_fat2Ahead	11	leading-trailing interface	22.507	0.854	0.696
wt_fat2Ahead	11	leading-trailing interface	25.892	0.982	0.801
wt_fat2Ahead	12	leading-trailing interface	21.231	0.806	0.804
wt_fat2Ahead	12	leading-trailing interface	23.045	0.874	0.872
wt_fat2Ahead	12	leading-trailing interface	23.238	0.882	0.879
wt_fat2Ahead	12	leading-trailing interface	27.893	1.058	1.056
wt_fat2Ahead	12	leading-trailing interface	25.396	0.964	0.961
wt_fat2Ahead	12	leading-trailing interface	24.628	0.934	0.932
wt_fat2Ahead	14	leading-trailing interface	23.349	0.886	0.987
wt_fat2Ahead	14	leading-trailing interface	18.225	0.692	0.77
wt_fat2Ahead	14	leading-trailing interface	15.353	0.583	0.649
wt_fat2Ahead	15	leading-trailing interface	27.975	1.061	0.855
wt_fat2Ahead	15	leading-trailing interface	18.225	0.692	0.557
wt_fat2Ahead	15	leading-trailing interface	22.785	0.865	0.696
wt_fat2Ahead	15	leading-trailing interface	18.807	0.714	0.575
wt_fat2Ahead	15	leading-trailing interface	19.806	0.752	0.605
wt_fat2Ahead	15	leading-trailing interface	18.065	0.685	0.552
wt_fat2Ahead	16	leading-trailing interface	21.217	0.805	0.785
wt_fat2Ahead	16	leading-trailing interface	22.018	0.835	0.814
wt_fat2Ahead	16	leading-trailing interface	18.16	0.689	0.672
wt_fat2Ahead	16	leading-trailing interface	19.528	0.741	0.722
wt_fat2Ahead	16	leading-trailing interface	22.884	0.868	0.846
wt_fat2Ahead	16	leading-trailing interface	21.273	0.807	0.787
wt_fat2Ahead	16	leading-trailing interface	17.891	0.679	0.662
wt_fat2Ahead	16	leading-trailing interface	19.969	0.758	0.739
wt_fat2Ahead	16	leading-trailing interface	21.66	0.822	0.801
wt_fat2Ahead	16	leading-trailing interface	17.155	0.651	0.634
wt_fat2Ahead	16	leading-trailing interface	15.051	0.571	0.557
wt_fat2Ahead	17	leading-trailing interface	25.346	0.962	0.877
wt_fat2Ahead	17	leading-trailing interface	24.534	0.931	0.849
wt_fat2Ahead	17	leading-trailing interface	22.473	0.853	0.777
wt_fat2Ahead	17	leading-trailing interface	14.962	0.568	0.518
wt_fat2Ahead	17	leading-trailing interface	25.274	0.959	0.874
wt_fat2Ahead	17	leading-trailing interface	22.417	0.851	0.775
wt_fat2Ahead	17	leading-trailing interface	23.713	0.9	0.82
wt_fat2Ahead	17	leading-trailing interface	19.767	0.75	0.684
wt_fat2Ahead	17	leading-trailing interface	20.493	0.778	0.709
wt_fat2Ahead	18	leading-trailing interface	27.525	1.044	1.012
wt_fat2Ahead	18	leading-trailing interface	23.679	0.898	0.871
wt_fat2Ahead	18	leading-trailing interface	19.495	0.74	0.717
wt_fat2Ahead	18	leading-trailing interface	27.624	1.048	1.016
wt_fat2Ahead	18	leading-trailing interface	25.453	0.966	0.936
wt_fat2Ahead	18	leading-trailing interface	20.577	0.781	0.757
wt_fat2Ahead	18	leading-trailing interface	30.396	1.153	1.118
wt_fat2Ahead	19	leading-trailing interface	18.387	0.698	0.765
wt_fat2Ahead	19	leading-trailing interface	22.993	0.872	0.957
wt_fat2Ahead	19	leading-trailing interface	19.393	0.736	0.807
wt_fat2Ahead	19	leading-trailing interface	25.593	0.971	1.065
wt_fat2Ahead	19	leading-trailing interface	25.331	0.961	1.054
wt_fat2Ahead	19	leading-trailing interface	21.047	0.799	0.876
wt_fat2Ahead	19	leading-trailing interface	21.408	0.812	0.891
wt_fat2Ahead	19	leading-trailing interface	17.649	0.67	0.735
wt_fat2Ahead	19	leading-trailing interface	16.964	0.644	0.706
wt_fat2Ahead	19	leading-trailing interface	21.697	0.823	0.903
wt_fat2Ahead	19	leading-trailing interface	22.519	0.854	0.937
wt_fat2Ahead	19	leading-trailing interface	22.387	0.849	0.932
wt_fat2Ahead	20	leading-trailing interface	19.241	0.73	0.726
wt_fat2Ahead	20	leading-trailing interface	16.308	0.619	0.615
wt_fat2Ahead	20	leading-trailing interface	17.758	0.674	0.67
wt_fat2Ahead	20	leading-trailing interface	19.603	0.744	0.74
wt_fat2Ahead	20	leading-trailing interface	14.409	0.547	0.544
wt_fat2Ahead	20	leading-trailing interface	14.188	0.538	0.535
wt_fat2Ahead	21	leading-trailing interface	19.579	0.743	0.887
wt_fat2Ahead	21	leading-trailing interface	19.156	0.727	0.868
wt_fat2Ahead	21	leading-trailing interface	14.859	0.564	0.673
wt_fat2Ahead	21	leading-trailing interface	24.05	0.913	1.09
wt_fat2Ahead	21	leading-trailing interface	17.277	0.656	0.783
wt_fat2Ahead	21	leading-trailing interface	13.255	0.503	0.601
wt_fat2Ahead	21	leading-trailing interface	15.523	0.589	0.703
wt_fat2Ahead	21	leading-trailing interface	18.024	0.684	0.817
wt_fat2Ahead	21	leading-trailing interface	22.05	0.837	0.999
wt_fat2Ahead	23	leading-trailing interface	25.155	0.954	0.888
wt_fat2Ahead	23	leading-trailing interface	27.472	1.042	0.97
wt_fat2Ahead	23	leading-trailing interface	17.331	0.658	0.612
wt_fat2Ahead	23	leading-trailing interface	27.587	1.047	0.974
wt_fat2Ahead	23	leading-trailing interface	25.462	0.966	0.899
wt_fat2Ahead	23	leading-trailing interface	24.756	0.939	0.874
wt_fat2Ahead	23	leading-trailing interface	24.09	0.914	0.851
wt_fat2Ahead	23	leading-trailing interface	26.466	1.004	0.935
wt_fat2Ahead	23	leading-trailing interface	19.722	0.748	0.696
wt_fat2Ahead	23	leading-trailing interface	19.917	0.756	0.703
wt_fat2Ahead	24	leading-trailing interface	18.701	0.71	0.61
wt_fat2Ahead	24	leading-trailing interface	19.893	0.755	0.649
wt_fat2Ahead	24	leading-trailing interface	25.132	0.954	0.819
wt_fat2Ahead	24	leading-trailing interface	22.672	0.86	0.739
wt_fat2Ahead	24	leading-trailing interface	20.467	0.777	0.667
wt_fat2Ahead	24	leading-trailing interface	22.927	0.87	0.748
wt_fat2Ahead	24	leading-trailing interface	20.694	0.785	0.675
wt_fat2Ahead	24	leading-trailing interface	21.039	0.798	0.686
wt_fat2Ahead	24	leading-trailing interface	16.1	0.611	0.525
wt_fat2Ahead	25	leading-trailing interface	15.878	0.602	0.679
wt_fat2Ahead	25	leading-trailing interface	18.337	0.696	0.784
wt_fat2Ahead	25	leading-trailing interface	15.832	0.601	0.677
wt_fat2Ahead	25	leading-trailing interface	16.953	0.643	0.725
wt_fat2Ahead	25	leading-trailing interface	17.695	0.671	0.756
wt_fat2Ahead	25	leading-trailing interface	21.352	0.81	0.913
wt_fat2Ahead	25	leading-trailing interface	14.929	0.566	0.638
wt_fat2Ahead	25	leading-trailing interface	12.514	0.475	0.535
wt_wtAhead	2	medial basal surface	11.917	0.878	1.059
wt_wtAhead	2	medial basal surface	11.528	0.849	1.025
wt_wtAhead	2	medial basal surface	9.64	0.71	0.857
wt_wtAhead	2	medial basal surface	10.997	0.81	0.977
wt_wtAhead	2	medial basal surface	12.154	0.895	1.08
wt_wtAhead	2	medial basal surface	11.267	0.83	1.001
wt_wtAhead	3	medial basal surface	9.268	0.683	0.958
wt_wtAhead	3	medial basal surface	10.033	0.739	1.038
wt_wtAhead	3	medial basal surface	10.175	0.749	1.052
wt_wtAhead	3	medial basal surface	9.375	0.69	0.969
wt_wtAhead	3	medial basal surface	10.353	0.762	1.071
wt_wtAhead	3	medial basal surface	9.773	0.72	1.011
wt_wtAhead	3	medial basal surface	11.289	0.831	1.167
wt_wtAhead	3	medial basal surface	9.55	0.703	0.988
wt_wtAhead	3	medial basal surface	10.426	0.768	1.078
wt_wtAhead	3	medial basal surface	9.363	0.69	0.968
wt_wtAhead	3	medial basal surface	8.721	0.642	0.902
wt_wtAhead	3	medial basal surface	10.262	0.756	1.061
wt_wtAhead	3	medial basal surface	8.141	0.6	0.842
wt_wtAhead	3	medial basal surface	8.55	0.63	0.884
wt_wtAhead	3	medial basal surface	9.77	0.72	1.01
wt_wtAhead	4	medial basal surface	11.955	0.88	1.028
wt_wtAhead	4	medial basal surface	12.511	0.921	1.076
wt_wtAhead	4	medial basal surface	12.996	0.957	1.117
wt_wtAhead	4	medial basal surface	11.236	0.827	0.966
wt_wtAhead	4	medial basal surface	10.489	0.772	0.902
wt_wtAhead	4	medial basal surface	11.491	0.846	0.988
wt_wtAhead	4	medial basal surface	11.888	0.875	1.022
wt_wtAhead	4	medial basal surface	12.087	0.89	1.039
wt_wtAhead	4	medial basal surface	11.438	0.842	0.983
wt_wtAhead	4	medial basal surface	12.189	0.898	1.048
wt_wtAhead	4	medial basal surface	13.112	0.966	1.127
wt_wtAhead	4	medial basal surface	11.193	0.824	0.962
wt_wtAhead	4	medial basal surface	11.929	0.879	1.025
wt_wtAhead	4	medial basal surface	11.873	0.874	1.021
wt_wtAhead	4	medial basal surface	11.285	0.831	0.97
wt_wtAhead	4	medial basal surface	12.486	0.92	1.073
wt_wtAhead	4	medial basal surface	11.184	0.824	0.961
wt_wtAhead	4	medial basal surface	11.352	0.836	0.976
wt_wtAhead	4	medial basal surface	10.782	0.794	0.927
wt_wtAhead	4	medial basal surface	10.336	0.761	0.889
wt_wtAhead	4	medial basal surface	11.633	0.857	1
wt_wtAhead	4	medial basal surface	10.786	0.794	0.927
wt_wtAhead	4	medial basal surface	11.317	0.833	0.973
wt_wtAhead	5	medial basal surface	11.948	0.88	0.989
wt_wtAhead	5	medial basal surface	12.557	0.925	1.039
wt_wtAhead	5	medial basal surface	14.431	1.063	1.195
wt_wtAhead	5	medial basal surface	10.829	0.797	0.896
wt_wtAhead	5	medial basal surface	10.766	0.793	0.891
wt_wtAhead	5	medial basal surface	10.999	0.81	0.911
wt_wtAhead	5	medial basal surface	11.214	0.826	0.928
wt_wtAhead	5	medial basal surface	13.518	0.996	1.119
wt_wtAhead	5	medial basal surface	11.838	0.872	0.98
wt_wtAhead	5	medial basal surface	12.493	0.92	1.034
wt_wtAhead	5	medial basal surface	11.87	0.874	0.983
wt_wtAhead	5	medial basal surface	12.282	0.905	1.017
wt_wtAhead	5	medial basal surface	12.073	0.889	0.999
wt_wtAhead	5	medial basal surface	13.344	0.983	1.105
wt_wtAhead	5	medial basal surface	12.41	0.914	1.027
wt_wtAhead	5	medial basal surface	10.709	0.789	0.887
wt_wtAhead	6	medial basal surface	10.777	0.794	0.879
wt_wtAhead	6	medial basal surface	11.796	0.869	0.962
wt_wtAhead	6	medial basal surface	12.801	0.943	1.044
wt_wtAhead	6	medial basal surface	11.384	0.838	0.928
wt_wtAhead	6	medial basal surface	11.882	0.875	0.969
wt_wtAhead	6	medial basal surface	12.991	0.957	1.059
wt_wtAhead	6	medial basal surface	12.931	0.952	1.055
wt_wtAhead	6	medial basal surface	11.837	0.872	0.965
wt_wtAhead	6	medial basal surface	13.002	0.958	1.06
wt_wtAhead	6	medial basal surface	11.581	0.853	0.944
wt_wtAhead	6	medial basal surface	13.898	1.024	1.133
wt_wtAhead	8	medial basal surface	14.299	1.053	1.095
wt_wtAhead	8	medial basal surface	14.163	1.043	1.085
wt_wtAhead	8	medial basal surface	11.981	0.882	0.917
wt_wtAhead	8	medial basal surface	12.882	0.949	0.986
wt_wtAhead	8	medial basal surface	12.565	0.925	0.962
wt_wtAhead	8	medial basal surface	13.53	0.996	1.036
wt_wtAhead	8	medial basal surface	12.03	0.886	0.921
wt_wtAhead	8	medial basal surface	14.037	1.034	1.075
wt_wtAhead	8	medial basal surface	12.768	0.94	0.978
wt_wtAhead	8	medial basal surface	13.178	0.97	1.009
wt_wtAhead	8	medial basal surface	12.69	0.935	0.972
wt_wtAhead	8	medial basal surface	11.596	0.854	0.888
wt_wtAhead	8	medial basal surface	14.049	1.035	1.076
wt_wtAhead	9	medial basal surface	13.297	0.979	1.141
wt_wtAhead	9	medial basal surface	11.154	0.821	0.957
wt_wtAhead	9	medial basal surface	12.254	0.902	1.051
wt_wtAhead	9	medial basal surface	12.13	0.893	1.04
wt_wtAhead	9	medial basal surface	11.537	0.85	0.99
wt_wtAhead	9	medial basal surface	11.782	0.868	1.011
wt_wtAhead	9	medial basal surface	11.948	0.88	1.025
wt_wtAhead	9	medial basal surface	12.68	0.934	1.088
wt_wtAhead	9	medial basal surface	10.119	0.745	0.868
wt_wtAhead	9	medial basal surface	11.54	0.85	0.99
wt_wtAhead	9	medial basal surface	13.082	0.963	1.122
wt_wtAhead	9	medial basal surface	11.599	0.854	0.995
wt_wtAhead	9	medial basal surface	12.336	0.908	1.058
wt_wtAhead	9	medial basal surface	14.318	1.054	1.228
wt_wtAhead	9	medial basal surface	10.403	0.766	0.892
wt_wtAhead	9	medial basal surface	11.835	0.872	1.015
wt_wtAhead	9	medial basal surface	9.91	0.73	0.85
wt_wtAhead	9	medial basal surface	10.973	0.808	0.941
wt_wtAhead	9	medial basal surface	9.17	0.675	0.787
wt_wtAhead	9	medial basal surface	11.831	0.871	1.015
wt_wtAhead	9	medial basal surface	11.051	0.814	0.948
wt_wtAhead	9	medial basal surface	11.537	0.85	0.99
wt_wtAhead	11	medial basal surface	11.47	0.845	0.985
wt_wtAhead	11	medial basal surface	11.538	0.85	0.991
wt_wtAhead	11	medial basal surface	12.558	0.925	1.079
wt_wtAhead	11	medial basal surface	13.758	1.013	1.182
wt_wtAhead	11	medial basal surface	11.152	0.821	0.958
wt_wtAhead	11	medial basal surface	13.565	0.999	1.165
wt_wtAhead	11	medial basal surface	10.503	0.773	0.902
wt_wtAhead	11	medial basal surface	11.837	0.872	1.017
wt_wtAhead	11	medial basal surface	13.292	0.979	1.142
wt_wtAhead	11	medial basal surface	10.419	0.767	0.895
wt_wtAhead	11	medial basal surface	8.909	0.656	0.765
wt_wtAhead	11	medial basal surface	10.693	0.787	0.919
wt_wtAhead	17	medial basal surface	15.673	1.154	1.065
wt_wtAhead	17	medial basal surface	16.563	1.22	1.125
wt_wtAhead	17	medial basal surface	13.297	0.979	0.903
wt_wtAhead	17	medial basal surface	14.205	1.046	0.965
wt_wtAhead	17	medial basal surface	13.531	0.996	0.919
wt_wtAhead	17	medial basal surface	14.477	1.066	0.983
wt_wtAhead	17	medial basal surface	16.643	1.226	1.131
wt_wtAhead	17	medial basal surface	15.147	1.115	1.029
wt_wtAhead	17	medial basal surface	14.325	1.055	0.973
wt_wtAhead	17	medial basal surface	13.347	0.983	0.907
wt_wtAhead	18	medial basal surface	14.476	1.066	0.863
wt_wtAhead	18	medial basal surface	15.245	1.123	0.909
wt_wtAhead	18	medial basal surface	15.588	1.148	0.93
wt_wtAhead	18	medial basal surface	16.344	1.204	0.975
wt_wtAhead	18	medial basal surface	16.146	1.189	0.963
wt_wtAhead	18	medial basal surface	19.172	1.412	1.143
wt_wtAhead	18	medial basal surface	19.385	1.428	1.156
wt_wtAhead	18	medial basal surface	16.478	1.214	0.983
wt_wtAhead	18	medial basal surface	16.385	1.207	0.977
wt_wtAhead	18	medial basal surface	17.697	1.303	1.055
wt_wtAhead	18	medial basal surface	17.553	1.293	1.047
wt_wtAhead	19	medial basal surface	11.902	0.877	0.796
wt_wtAhead	19	medial basal surface	13.764	1.014	0.921
wt_wtAhead	19	medial basal surface	15.285	1.126	1.023
wt_wtAhead	19	medial basal surface	14.52	1.069	0.972
wt_wtAhead	19	medial basal surface	14.687	1.082	0.983
wt_wtAhead	19	medial basal surface	16.862	1.242	1.128
wt_wtAhead	19	medial basal surface	15.119	1.113	1.012
wt_wtAhead	19	medial basal surface	16.864	1.242	1.128
wt_wtAhead	19	medial basal surface	13.124	0.967	0.878
wt_wtAhead	19	medial basal surface	15.246	1.123	1.02
wt_wtAhead	19	medial basal surface	17.026	1.254	1.139
wt_wtAhead	20	medial basal surface	13.181	0.971	0.942
wt_wtAhead	20	medial basal surface	12.762	0.94	0.912
wt_wtAhead	20	medial basal surface	14.101	1.038	1.007
wt_wtAhead	20	medial basal surface	14.763	1.087	1.055
wt_wtAhead	20	medial basal surface	14.711	1.083	1.051
wt_wtAhead	20	medial basal surface	13.429	0.989	0.959
wt_wtAhead	20	medial basal surface	13.524	0.996	0.966
wt_wtAhead	20	medial basal surface	12.977	0.956	0.927
wt_wtAhead	20	medial basal surface	13.394	0.986	0.957
wt_wtAhead	20	medial basal surface	14.462	1.065	1.033
wt_wtAhead	20	medial basal surface	14.522	1.069	1.037
wt_wtAhead	20	medial basal surface	13.672	1.007	0.977
wt_wtAhead	20	medial basal surface	15.578	1.147	1.113
wt_wtAhead	20	medial basal surface	15.283	1.126	1.092
wt_wtAhead	20	medial basal surface	13.609	1.002	0.972
wt_wtAhead	21	medial basal surface	13.348	0.983	0.976
wt_wtAhead	21	medial basal surface	13.688	1.008	1.001
wt_wtAhead	21	medial basal surface	14.456	1.065	1.057
wt_wtAhead	21	medial basal surface	16.54	1.218	1.209
wt_wtAhead	21	medial basal surface	13.769	1.014	1.007
wt_wtAhead	21	medial basal surface	14.339	1.056	1.048
wt_wtAhead	21	medial basal surface	13.737	1.012	1.004
wt_wtAhead	21	medial basal surface	12.998	0.957	0.95
wt_wtAhead	21	medial basal surface	16.228	1.195	1.186
wt_wtAhead	21	medial basal surface	15.564	1.146	1.138
wt_wtAhead	21	medial basal surface	14.282	1.052	1.044
wt_wtAhead	21	medial basal surface	10.783	0.794	0.788
wt_wtAhead	21	medial basal surface	14.153	1.042	1.035
wt_wtAhead	21	medial basal surface	12.08	0.89	0.883
wt_wtAhead	21	medial basal surface	10.984	0.809	0.803
wt_wtAhead	21	medial basal surface	13.563	0.999	0.992
wt_wtAhead	21	medial basal surface	12.327	0.908	0.901
wt_wtAhead	21	medial basal surface	14.029	1.033	1.026
wt_wtAhead	21	medial basal surface	11.942	0.879	0.873
wt_wtAhead	21	medial basal surface	15.375	1.132	1.124
wt_wtAhead	21	medial basal surface	12.986	0.956	0.949
wt_wtAhead	21	medial basal surface	13.769	1.014	1.007
wt_wtAhead	22	medial basal surface	13.309	0.98	0.804
wt_wtAhead	22	medial basal surface	14.163	1.043	0.855
wt_wtAhead	22	medial basal surface	16.566	1.22	1
wt_wtAhead	22	medial basal surface	19.184	1.413	1.159
wt_wtAhead	22	medial basal surface	16.94	1.248	1.023
wt_wtAhead	22	medial basal surface	18.393	1.355	1.111
wt_wtAhead	22	medial basal surface	15.53	1.144	0.938
wt_wtAhead	22	medial basal surface	18.593	1.369	1.123
wt_wtAhead	22	medial basal surface	17.025	1.254	1.028
wt_wtAhead	22	medial basal surface	16.036	1.181	0.968
wt_wtAhead	22	medial basal surface	17.156	1.263	1.036
wt_wtAhead	22	medial basal surface	14.072	1.036	0.85
wt_wtAhead	22	medial basal surface	15.286	1.126	0.923
wt_wtAhead	22	medial basal surface	17.107	1.26	1.033
wt_wtAhead	22	medial basal surface	18.414	1.356	1.112
wt_wtAhead	22	medial basal surface	17.174	1.265	1.037
wt_wtAhead	23	medial basal surface	17.406	1.282	1.09
wt_wtAhead	23	medial basal surface	15.355	1.131	0.962
wt_wtAhead	23	medial basal surface	16.897	1.244	1.058
wt_wtAhead	23	medial basal surface	17.543	1.292	1.099
wt_wtAhead	23	medial basal surface	16.581	1.221	1.039
wt_wtAhead	23	medial basal surface	16.523	1.217	1.035
wt_wtAhead	23	medial basal surface	16.85	1.241	1.056
wt_wtAhead	23	medial basal surface	15.195	1.119	0.952
wt_wtAhead	23	medial basal surface	15.691	1.156	0.983
wt_wtAhead	23	medial basal surface	17.533	1.291	1.098
wt_wtAhead	23	medial basal surface	16.945	1.248	1.061
wt_wtAhead	23	medial basal surface	15.581	1.147	0.976
wt_wtAhead	23	medial basal surface	15.514	1.143	0.972
wt_wtAhead	23	medial basal surface	15.677	1.155	0.982
wt_wtAhead	23	medial basal surface	15.903	1.171	0.996
wt_wtAhead	23	medial basal surface	16.081	1.184	1.007
wt_wtAhead	23	medial basal surface	16.233	1.195	1.017
wt_wtAhead	23	medial basal surface	15.384	1.133	0.964
wt_wtAhead	23	medial basal surface	14.699	1.083	0.921
wt_wtAhead	23	medial basal surface	15.036	1.107	0.942
wt_wtAhead	23	medial basal surface	15.715	1.157	0.984
wt_wtAhead	23	medial basal surface	16.277	1.199	1.02
wt_wtAhead	23	medial basal surface	18.629	1.372	1.167
wt_wtAhead	23	medial basal surface	16.647	1.226	1.043
wt_wtAhead	23	medial basal surface	15.913	1.172	0.997
wt_wtAhead	23	medial basal surface	16.179	1.191	1.013
wt_wtAhead	23	medial basal surface	16.303	1.201	1.021
wt_wtAhead	23	medial basal surface	14.232	1.048	0.892
wt_wtAhead	23	medial basal surface	13.948	1.027	0.874
wt_wtAhead	23	medial basal surface	19.331	1.424	1.211
wt_wtAhead	23	medial basal surface	14.981	1.103	0.938
wt_wtAhead	23	medial basal surface	13.938	1.026	0.873
wt_wtAhead	23	medial basal surface	11.366	0.837	0.712
wt_wtAhead	23	medial basal surface	16.681	1.228	1.045
wt_wtAhead	24	medial basal surface	13.739	1.012	0.922
wt_wtAhead	24	medial basal surface	11.571	0.852	0.777
wt_wtAhead	24	medial basal surface	13.992	1.03	0.939
wt_wtAhead	24	medial basal surface	12.838	0.945	0.862
wt_wtAhead	24	medial basal surface	15.616	1.15	1.048
wt_wtAhead	24	medial basal surface	16.863	1.242	1.132
wt_wtAhead	24	medial basal surface	15.717	1.157	1.055
wt_wtAhead	24	medial basal surface	15.236	1.122	1.023
wt_wtAhead	24	medial basal surface	14.98	1.103	1.005
wt_wtAhead	24	medial basal surface	13.98	1.03	0.938
wt_wtAhead	24	medial basal surface	18.049	1.329	1.211
wt_wtAhead	24	medial basal surface	13.888	1.023	0.932
wt_wtAhead	24	medial basal surface	15.881	1.17	1.066
wt_wtAhead	24	medial basal surface	14.178	1.044	0.952
wt_wtAhead	24	medial basal surface	14.091	1.038	0.946
wt_wtAhead	24	medial basal surface	14.798	1.09	0.993
wt_wtAhead	24	medial basal surface	15.93	1.173	1.069
wt_wtAhead	24	medial basal surface	16.819	1.239	1.129
wt_wtAhead	25	medial basal surface	13.677	1.007	0.979
wt_wtAhead	25	medial basal surface	13.566	0.999	0.971
wt_wtAhead	25	medial basal surface	9.396	0.692	0.673
wt_wtAhead	25	medial basal surface	14.202	1.046	1.017
wt_wtAhead	25	medial basal surface	12.536	0.923	0.897
wt_wtAhead	25	medial basal surface	11.678	0.86	0.836
wt_wtAhead	25	medial basal surface	13.217	0.973	0.946
wt_wtAhead	25	medial basal surface	13.736	1.012	0.983
wt_wtAhead	25	medial basal surface	15.909	1.172	1.139
wt_wtAhead	25	medial basal surface	18.458	1.359	1.321
wt_wtAhead	25	medial basal surface	14.708	1.083	1.053
wt_wtAhead	25	medial basal surface	17.175	1.265	1.229
wt_wtAhead	25	medial basal surface	14.752	1.086	1.056
wt_wtAhead	25	medial basal surface	12.584	0.927	0.901
fat2_fat2Ahead	2	medial basal surface	10.513	0.774	0.934
fat2_fat2Ahead	2	medial basal surface	11.554	0.851	1.027
fat2_fat2Ahead	2	medial basal surface	12.07	0.889	1.073
fat2_fat2Ahead	2	medial basal surface	12.517	0.922	1.113
fat2_fat2Ahead	3	medial basal surface	11.592	0.854	1.199
fat2_fat2Ahead	3	medial basal surface	12.023	0.885	1.243
fat2_fat2Ahead	3	medial basal surface	13.707	1.009	1.417
fat2_fat2Ahead	3	medial basal surface	11.404	0.84	1.179
fat2_fat2Ahead	3	medial basal surface	11.55	0.851	1.194
fat2_fat2Ahead	3	medial basal surface	12.008	0.884	1.242
fat2_fat2Ahead	3	medial basal surface	11.758	0.866	1.216
fat2_fat2Ahead	3	medial basal surface	11.723	0.863	1.212
fat2_fat2Ahead	3	medial basal surface	12.169	0.896	1.258
fat2_fat2Ahead	3	medial basal surface	11.138	0.82	1.152
fat2_fat2Ahead	3	medial basal surface	12.438	0.916	1.286
fat2_fat2Ahead	3	medial basal surface	12.648	0.931	1.308
fat2_fat2Ahead	3	medial basal surface	12.331	0.908	1.275
fat2_fat2Ahead	3	medial basal surface	12.656	0.932	1.309
fat2_fat2Ahead	3	medial basal surface	12.81	0.943	1.325
fat2_fat2Ahead	3	medial basal surface	11.808	0.87	1.221
fat2_fat2Ahead	4	medial basal surface	10.64	0.784	0.915
fat2_fat2Ahead	4	medial basal surface	12.154	0.895	1.045
fat2_fat2Ahead	4	medial basal surface	12.745	0.939	1.096
fat2_fat2Ahead	4	medial basal surface	11.614	0.855	0.998
fat2_fat2Ahead	4	medial basal surface	10.689	0.787	0.919
fat2_fat2Ahead	5	medial basal surface	13.594	1.001	1.125
fat2_fat2Ahead	5	medial basal surface	13.129	0.967	1.087
fat2_fat2Ahead	5	medial basal surface	13.247	0.976	1.097
fat2_fat2Ahead	5	medial basal surface	11.588	0.853	0.959
fat2_fat2Ahead	5	medial basal surface	12.725	0.937	1.053
fat2_fat2Ahead	5	medial basal surface	12.466	0.918	1.032
fat2_fat2Ahead	5	medial basal surface	11.073	0.815	0.917
fat2_fat2Ahead	5	medial basal surface	14.767	1.088	1.222
fat2_fat2Ahead	5	medial basal surface	13.948	1.027	1.155
fat2_fat2Ahead	5	medial basal surface	13.22	0.974	1.094
fat2_fat2Ahead	5	medial basal surface	10.787	0.794	0.893
fat2_fat2Ahead	5	medial basal surface	10.862	0.8	0.899
fat2_fat2Ahead	6	medial basal surface	12.505	0.921	1.02
fat2_fat2Ahead	6	medial basal surface	11.695	0.861	0.954
fat2_fat2Ahead	6	medial basal surface	12.979	0.956	1.058
fat2_fat2Ahead	6	medial basal surface	12.164	0.896	0.992
fat2_fat2Ahead	6	medial basal surface	12.71	0.936	1.037
fat2_fat2Ahead	6	medial basal surface	12.157	0.895	0.991
fat2_fat2Ahead	6	medial basal surface	12.9	0.95	1.052
fat2_fat2Ahead	6	medial basal surface	13.114	0.966	1.069
fat2_fat2Ahead	6	medial basal surface	11.495	0.847	0.937
fat2_fat2Ahead	6	medial basal surface	11.672	0.86	0.952
fat2_fat2Ahead	6	medial basal surface	12.345	0.909	1.007
fat2_fat2Ahead	6	medial basal surface	11.833	0.871	0.965
fat2_fat2Ahead	6	medial basal surface	12.01	0.884	0.979
fat2_fat2Ahead	6	medial basal surface	10.43	0.768	0.851
fat2_fat2Ahead	6	medial basal surface	10.333	0.761	0.843
fat2_fat2Ahead	6	medial basal surface	12.818	0.944	1.045
fat2_fat2Ahead	8	medial basal surface	15.198	1.119	1.164
fat2_fat2Ahead	8	medial basal surface	14.292	1.053	1.094
fat2_fat2Ahead	8	medial basal surface	12.851	0.946	0.984
fat2_fat2Ahead	8	medial basal surface	13.254	0.976	1.015
fat2_fat2Ahead	9	medial basal surface	10.479	0.772	0.899
fat2_fat2Ahead	9	medial basal surface	11.074	0.816	0.95
fat2_fat2Ahead	9	medial basal surface	12.228	0.901	1.049
fat2_fat2Ahead	9	medial basal surface	12.188	0.898	1.045
fat2_fat2Ahead	9	medial basal surface	13.285	0.978	1.14
fat2_fat2Ahead	9	medial basal surface	12.705	0.936	1.09
fat2_fat2Ahead	9	medial basal surface	12.819	0.944	1.1
fat2_fat2Ahead	9	medial basal surface	13.155	0.969	1.128
fat2_fat2Ahead	9	medial basal surface	12.814	0.944	1.099
fat2_fat2Ahead	9	medial basal surface	13.298	0.979	1.141
fat2_fat2Ahead	9	medial basal surface	17.67	1.301	1.516
fat2_fat2Ahead	9	medial basal surface	14.921	1.099	1.28
fat2_fat2Ahead	9	medial basal surface	13.901	1.024	1.192
fat2_fat2Ahead	9	medial basal surface	17.81	1.312	1.528
fat2_fat2Ahead	9	medial basal surface	14.689	1.082	1.26
fat2_fat2Ahead	11	medial basal surface	13.041	0.96	1.12
fat2_fat2Ahead	11	medial basal surface	13.396	0.987	1.151
fat2_fat2Ahead	11	medial basal surface	14.219	1.047	1.221
fat2_fat2Ahead	11	medial basal surface	14.801	1.09	1.271
fat2_fat2Ahead	17	medial basal surface	16.977	1.25	1.153
fat2_fat2Ahead	17	medial basal surface	14.733	1.085	1.001
fat2_fat2Ahead	17	medial basal surface	18.31	1.348	1.244
fat2_fat2Ahead	17	medial basal surface	17.923	1.32	1.218
fat2_fat2Ahead	17	medial basal surface	18.417	1.356	1.251
fat2_fat2Ahead	17	medial basal surface	19.8	1.458	1.345
fat2_fat2Ahead	17	medial basal surface	18.211	1.341	1.237
fat2_fat2Ahead	17	medial basal surface	17.688	1.303	1.202
fat2_fat2Ahead	17	medial basal surface	14.63	1.077	0.994
fat2_fat2Ahead	17	medial basal surface	16.362	1.205	1.111
fat2_fat2Ahead	17	medial basal surface	16.121	1.187	1.095
fat2_fat2Ahead	17	medial basal surface	17.168	1.264	1.166
fat2_fat2Ahead	18	medial basal surface	17.055	1.256	1.017
fat2_fat2Ahead	18	medial basal surface	15.797	1.163	0.942
fat2_fat2Ahead	18	medial basal surface	17.344	1.277	1.034
fat2_fat2Ahead	18	medial basal surface	15.387	1.133	0.918
fat2_fat2Ahead	18	medial basal surface	15.437	1.137	0.921
fat2_fat2Ahead	18	medial basal surface	14.94	1.1	0.891
fat2_fat2Ahead	19	medial basal surface	14.902	1.097	0.997
fat2_fat2Ahead	19	medial basal surface	15.991	1.178	1.07
fat2_fat2Ahead	19	medial basal surface	19.538	1.439	1.307
fat2_fat2Ahead	19	medial basal surface	16.502	1.215	1.104
fat2_fat2Ahead	19	medial basal surface	18.295	1.347	1.224
fat2_fat2Ahead	19	medial basal surface	18.795	1.384	1.258
fat2_fat2Ahead	19	medial basal surface	14.982	1.103	1.002
fat2_fat2Ahead	19	medial basal surface	13.471	0.992	0.901
fat2_fat2Ahead	19	medial basal surface	14.878	1.096	0.995
fat2_fat2Ahead	19	medial basal surface	15.917	1.172	1.065
fat2_fat2Ahead	19	medial basal surface	16.638	1.225	1.113
fat2_fat2Ahead	19	medial basal surface	14.571	1.073	0.975
fat2_fat2Ahead	19	medial basal surface	16.2	1.193	1.084
fat2_fat2Ahead	19	medial basal surface	15.271	1.125	1.022
fat2_fat2Ahead	19	medial basal surface	15.072	1.11	1.008
fat2_fat2Ahead	20	medial basal surface	17.449	1.285	1.247
fat2_fat2Ahead	20	medial basal surface	17.244	1.27	1.232
fat2_fat2Ahead	20	medial basal surface	16.087	1.185	1.149
fat2_fat2Ahead	20	medial basal surface	14.878	1.096	1.063
fat2_fat2Ahead	20	medial basal surface	13.872	1.022	0.991
fat2_fat2Ahead	20	medial basal surface	16.242	1.196	1.16
fat2_fat2Ahead	20	medial basal surface	18.719	1.379	1.337
fat2_fat2Ahead	20	medial basal surface	13.546	0.998	0.968
fat2_fat2Ahead	20	medial basal surface	17.68	1.302	1.263
fat2_fat2Ahead	20	medial basal surface	15.949	1.175	1.139
fat2_fat2Ahead	20	medial basal surface	12.694	0.935	0.907
fat2_fat2Ahead	20	medial basal surface	12.393	0.913	0.885
fat2_fat2Ahead	20	medial basal surface	12.91	0.951	0.922
fat2_fat2Ahead	20	medial basal surface	12.976	0.956	0.927
fat2_fat2Ahead	20	medial basal surface	14.927	1.099	1.066
fat2_fat2Ahead	20	medial basal surface	11.019	0.811	0.787
fat2_fat2Ahead	20	medial basal surface	12.88	0.949	0.92
fat2_fat2Ahead	20	medial basal surface	18.426	1.357	1.316
fat2_fat2Ahead	20	medial basal surface	18.818	1.386	1.344
fat2_fat2Ahead	20	medial basal surface	14.165	1.043	1.012
fat2_fat2Ahead	20	medial basal surface	17.599	1.296	1.257
fat2_fat2Ahead	20	medial basal surface	17.578	1.295	1.256
fat2_fat2Ahead	21	medial basal surface	11.307	0.833	0.827
fat2_fat2Ahead	21	medial basal surface	11.699	0.862	0.855
fat2_fat2Ahead	21	medial basal surface	9.6	0.707	0.702
fat2_fat2Ahead	21	medial basal surface	10.729	0.79	0.784
fat2_fat2Ahead	21	medial basal surface	11.081	0.816	0.81
fat2_fat2Ahead	21	medial basal surface	10.899	0.803	0.797
fat2_fat2Ahead	21	medial basal surface	10.84	0.798	0.792
fat2_fat2Ahead	21	medial basal surface	14.181	1.044	1.037
fat2_fat2Ahead	21	medial basal surface	13.54	0.997	0.99
fat2_fat2Ahead	21	medial basal surface	13.876	1.022	1.014
fat2_fat2Ahead	21	medial basal surface	12.755	0.939	0.932
fat2_fat2Ahead	21	medial basal surface	13.057	0.962	0.955
fat2_fat2Ahead	21	medial basal surface	16.19	1.192	1.184
fat2_fat2Ahead	21	medial basal surface	13.217	0.973	0.966
fat2_fat2Ahead	21	medial basal surface	15.908	1.172	1.163
fat2_fat2Ahead	21	medial basal surface	13.433	0.989	0.982
fat2_fat2Ahead	21	medial basal surface	12.677	0.934	0.927
fat2_fat2Ahead	21	medial basal surface	15.031	1.107	1.099
fat2_fat2Ahead	21	medial basal surface	11.866	0.874	0.867
fat2_fat2Ahead	21	medial basal surface	12.455	0.917	0.911
fat2_fat2Ahead	21	medial basal surface	10.026	0.738	0.733
fat2_fat2Ahead	21	medial basal surface	11.388	0.839	0.833
fat2_fat2Ahead	21	medial basal surface	11.36	0.837	0.83
fat2_fat2Ahead	21	medial basal surface	12.46	0.918	0.911
fat2_fat2Ahead	21	medial basal surface	12.927	0.952	0.945
fat2_fat2Ahead	21	medial basal surface	10.629	0.783	0.777
fat2_fat2Ahead	21	medial basal surface	10.929	0.805	0.799
fat2_fat2Ahead	21	medial basal surface	11.124	0.819	0.813
fat2_fat2Ahead	21	medial basal surface	9.106	0.671	0.666
fat2_fat2Ahead	21	medial basal surface	9.846	0.725	0.72
fat2_fat2Ahead	21	medial basal surface	14.472	1.066	1.058
fat2_fat2Ahead	21	medial basal surface	13.623	1.003	0.996
fat2_fat2Ahead	21	medial basal surface	14.795	1.09	1.082
fat2_fat2Ahead	21	medial basal surface	14.464	1.065	1.057
fat2_fat2Ahead	21	medial basal surface	13.153	0.969	0.962
fat2_fat2Ahead	21	medial basal surface	14.14	1.041	1.034
fat2_fat2Ahead	21	medial basal surface	13.692	1.008	1.001
fat2_fat2Ahead	21	medial basal surface	8.86	0.652	0.648
fat2_fat2Ahead	21	medial basal surface	10.351	0.762	0.757
fat2_fat2Ahead	21	medial basal surface	9.452	0.696	0.691
fat2_fat2Ahead	21	medial basal surface	11.854	0.873	0.867
fat2_fat2Ahead	21	medial basal surface	12.947	0.953	0.946
fat2_fat2Ahead	21	medial basal surface	11.924	0.878	0.872
fat2_fat2Ahead	21	medial basal surface	10.486	0.772	0.767
fat2_fat2Ahead	21	medial basal surface	8.87	0.653	0.648
fat2_fat2Ahead	21	medial basal surface	12.127	0.893	0.887
fat2_fat2Ahead	21	medial basal surface	12.378	0.912	0.905
fat2_fat2Ahead	21	medial basal surface	12.354	0.91	0.903
fat2_fat2Ahead	21	medial basal surface	12.666	0.933	0.926
fat2_fat2Ahead	21	medial basal surface	12.874	0.948	0.941
fat2_fat2Ahead	21	medial basal surface	13.281	0.978	0.971
fat2_fat2Ahead	21	medial basal surface	12.987	0.956	0.949
fat2_fat2Ahead	22	medial basal surface	15.519	1.143	0.937
fat2_fat2Ahead	22	medial basal surface	13.604	1.002	0.822
fat2_fat2Ahead	22	medial basal surface	13.583	1	0.82
fat2_fat2Ahead	22	medial basal surface	16.989	1.251	1.026
fat2_fat2Ahead	22	medial basal surface	15.902	1.171	0.96
fat2_fat2Ahead	22	medial basal surface	15.958	1.175	0.964
fat2_fat2Ahead	22	medial basal surface	17.157	1.264	1.036
fat2_fat2Ahead	22	medial basal surface	15.508	1.142	0.937
fat2_fat2Ahead	22	medial basal surface	17.607	1.297	1.063
fat2_fat2Ahead	22	medial basal surface	16.974	1.25	1.025
fat2_fat2Ahead	22	medial basal surface	16.201	1.193	0.978
fat2_fat2Ahead	22	medial basal surface	18.269	1.345	1.103
fat2_fat2Ahead	22	medial basal surface	17.178	1.265	1.037
fat2_fat2Ahead	22	medial basal surface	15.087	1.111	0.911
fat2_fat2Ahead	22	medial basal surface	15.649	1.152	0.945
fat2_fat2Ahead	22	medial basal surface	17.497	1.289	1.057
fat2_fat2Ahead	22	medial basal surface	13.078	0.963	0.79
fat2_fat2Ahead	22	medial basal surface	15.729	1.158	0.95
fat2_fat2Ahead	22	medial basal surface	16.777	1.236	1.013
fat2_fat2Ahead	22	medial basal surface	16.971	1.25	1.025
fat2_fat2Ahead	22	medial basal surface	14.08	1.037	0.85
fat2_fat2Ahead	22	medial basal surface	15.774	1.162	0.953
fat2_fat2Ahead	22	medial basal surface	16.441	1.211	0.993
fat2_fat2Ahead	22	medial basal surface	13.273	0.977	0.802
fat2_fat2Ahead	23	medial basal surface	13.432	0.989	0.841
fat2_fat2Ahead	23	medial basal surface	15.003	1.105	0.94
fat2_fat2Ahead	23	medial basal surface	18.041	1.329	1.13
fat2_fat2Ahead	23	medial basal surface	15.287	1.126	0.958
fat2_fat2Ahead	23	medial basal surface	15.955	1.175	0.999
fat2_fat2Ahead	23	medial basal surface	14.187	1.045	0.889
fat2_fat2Ahead	23	medial basal surface	15.398	1.134	0.965
fat2_fat2Ahead	23	medial basal surface	15.326	1.129	0.96
fat2_fat2Ahead	23	medial basal surface	15.381	1.133	0.963
fat2_fat2Ahead	23	medial basal surface	12.866	0.948	0.806
fat2_fat2Ahead	23	medial basal surface	14.116	1.04	0.884
fat2_fat2Ahead	23	medial basal surface	15.829	1.166	0.992
fat2_fat2Ahead	23	medial basal surface	13.832	1.019	0.866
fat2_fat2Ahead	23	medial basal surface	12.923	0.952	0.81
fat2_fat2Ahead	23	medial basal surface	15.872	1.169	0.994
fat2_fat2Ahead	23	medial basal surface	16.783	1.236	1.051
fat2_fat2Ahead	24	medial basal surface	12.298	0.906	0.825
fat2_fat2Ahead	24	medial basal surface	13.161	0.969	0.883
fat2_fat2Ahead	24	medial basal surface	9.818	0.723	0.659
fat2_fat2Ahead	24	medial basal surface	14.297	1.053	0.96
fat2_fat2Ahead	24	medial basal surface	15.047	1.108	1.01
fat2_fat2Ahead	24	medial basal surface	15.466	1.139	1.038
fat2_fat2Ahead	24	medial basal surface	15.203	1.12	1.02
fat2_fat2Ahead	24	medial basal surface	14.889	1.096	0.999
fat2_fat2Ahead	24	medial basal surface	15.047	1.108	1.01
fat2_fat2Ahead	24	medial basal surface	15.431	1.136	1.036
fat2_fat2Ahead	24	medial basal surface	13.229	0.974	0.888
fat2_fat2Ahead	24	medial basal surface	13.927	1.026	0.935
fat2_fat2Ahead	24	medial basal surface	13.065	0.962	0.877
fat2_fat2Ahead	25	medial basal surface	16.666	1.227	1.193
fat2_fat2Ahead	25	medial basal surface	15.077	1.11	1.079
fat2_fat2Ahead	25	medial basal surface	14.455	1.065	1.035
fat2_fat2Ahead	25	medial basal surface	16.295	1.2	1.166
fat2_fat2Ahead	25	medial basal surface	15.549	1.145	1.113
fat2_fat2Ahead	25	medial basal surface	16.366	1.205	1.171
fat2_fat2Ahead	25	medial basal surface	15.161	1.117	1.085
fat2_fat2Ahead	25	medial basal surface	16.42	1.209	1.175
fat2_fat2Ahead	25	medial basal surface	16.705	1.23	1.196
fat2_fat2Ahead	25	medial basal surface	14.259	1.05	1.021
fat2_fat2Ahead	25	medial basal surface	16.694	1.229	1.195
fat2_wtAhead	2	medial basal surface	11.033	0.813	0.981
fat2_wtAhead	2	medial basal surface	11.268	0.83	1.002
fat2_wtAhead	2	medial basal surface	11.011	0.811	0.979
fat2_wtAhead	2	medial basal surface	12.665	0.933	1.126
fat2_wtAhead	2	medial basal surface	10.029	0.739	0.891
fat2_wtAhead	2	medial basal surface	10.182	0.75	0.905
fat2_wtAhead	2	medial basal surface	11.053	0.814	0.982
fat2_wtAhead	3	medial basal surface	12.179	0.897	1.259
fat2_wtAhead	3	medial basal surface	11.058	0.814	1.144
fat2_wtAhead	3	medial basal surface	10.339	0.761	1.069
fat2_wtAhead	3	medial basal surface	12.192	0.898	1.261
fat2_wtAhead	3	medial basal surface	11.992	0.883	1.24
fat2_wtAhead	3	medial basal surface	14.194	1.045	1.468
fat2_wtAhead	3	medial basal surface	10.544	0.777	1.09
fat2_wtAhead	4	medial basal surface	12.849	0.946	1.105
fat2_wtAhead	4	medial basal surface	11.584	0.853	0.996
fat2_wtAhead	4	medial basal surface	11.758	0.866	1.011
fat2_wtAhead	4	medial basal surface	12	0.884	1.032
fat2_wtAhead	4	medial basal surface	11.128	0.82	0.957
fat2_wtAhead	4	medial basal surface	11.802	0.869	1.015
fat2_wtAhead	5	medial basal surface	10.353	0.762	0.857
fat2_wtAhead	5	medial basal surface	11.839	0.872	0.98
fat2_wtAhead	5	medial basal surface	12.271	0.904	1.016
fat2_wtAhead	5	medial basal surface	14.411	1.061	1.193
fat2_wtAhead	5	medial basal surface	13.908	1.024	1.151
fat2_wtAhead	5	medial basal surface	12.087	0.89	1.001
fat2_wtAhead	5	medial basal surface	12.279	0.904	1.016
fat2_wtAhead	5	medial basal surface	12.826	0.945	1.062
fat2_wtAhead	5	medial basal surface	12.129	0.893	1.004
fat2_wtAhead	5	medial basal surface	11.325	0.834	0.937
fat2_wtAhead	6	medial basal surface	11.744	0.865	0.958
fat2_wtAhead	6	medial basal surface	11.777	0.867	0.96
fat2_wtAhead	6	medial basal surface	10.809	0.796	0.882
fat2_wtAhead	6	medial basal surface	12.038	0.887	0.982
fat2_wtAhead	8	medial basal surface	15.432	1.136	1.182
fat2_wtAhead	8	medial basal surface	17.373	1.279	1.33
fat2_wtAhead	8	medial basal surface	12.036	0.886	0.922
fat2_wtAhead	8	medial basal surface	13.644	1.005	1.045
fat2_wtAhead	9	medial basal surface	13.441	0.99	1.153
fat2_wtAhead	9	medial basal surface	14.392	1.06	1.234
fat2_wtAhead	9	medial basal surface	12.758	0.94	1.094
fat2_wtAhead	9	medial basal surface	11.709	0.862	1.004
fat2_wtAhead	11	medial basal surface	11.873	0.874	1.02
fat2_wtAhead	11	medial basal surface	10.286	0.758	0.884
fat2_wtAhead	11	medial basal surface	11.295	0.832	0.97
fat2_wtAhead	11	medial basal surface	10.288	0.758	0.884
fat2_wtAhead	11	medial basal surface	13.527	0.996	1.162
fat2_wtAhead	11	medial basal surface	11.114	0.818	0.955
fat2_wtAhead	11	medial basal surface	13.171	0.97	1.131
fat2_wtAhead	11	medial basal surface	13.981	1.03	1.201
fat2_wtAhead	11	medial basal surface	12.728	0.937	1.093
fat2_wtAhead	17	medial basal surface	15.402	1.134	1.046
fat2_wtAhead	17	medial basal surface	15.563	1.146	1.057
fat2_wtAhead	17	medial basal surface	15.423	1.136	1.048
fat2_wtAhead	17	medial basal surface	18.218	1.342	1.238
fat2_wtAhead	17	medial basal surface	15.772	1.162	1.071
fat2_wtAhead	17	medial basal surface	15.039	1.108	1.022
fat2_wtAhead	17	medial basal surface	15.454	1.138	1.05
fat2_wtAhead	17	medial basal surface	15.101	1.112	1.026
fat2_wtAhead	18	medial basal surface	17.407	1.282	1.038
fat2_wtAhead	18	medial basal surface	17.442	1.285	1.04
fat2_wtAhead	18	medial basal surface	16.447	1.211	0.981
fat2_wtAhead	18	medial basal surface	14.831	1.092	0.884
fat2_wtAhead	18	medial basal surface	15.817	1.165	0.943
fat2_wtAhead	19	medial basal surface	15.092	1.111	1.01
fat2_wtAhead	19	medial basal surface	16.036	1.181	1.073
fat2_wtAhead	19	medial basal surface	14.68	1.081	0.982
fat2_wtAhead	19	medial basal surface	16.219	1.194	1.085
fat2_wtAhead	19	medial basal surface	14.45	1.064	0.967
fat2_wtAhead	20	medial basal surface	14.528	1.07	1.038
fat2_wtAhead	20	medial basal surface	17.123	1.261	1.223
fat2_wtAhead	20	medial basal surface	12.052	0.888	0.861
fat2_wtAhead	20	medial basal surface	16.062	1.183	1.147
fat2_wtAhead	20	medial basal surface	10.812	0.796	0.772
fat2_wtAhead	20	medial basal surface	13.957	1.028	0.997
fat2_wtAhead	20	medial basal surface	17.801	1.311	1.272
fat2_wtAhead	20	medial basal surface	17.561	1.293	1.255
fat2_wtAhead	20	medial basal surface	12.166	0.896	0.869
fat2_wtAhead	20	medial basal surface	17.122	1.261	1.223
fat2_wtAhead	20	medial basal surface	16.257	1.197	1.161
fat2_wtAhead	20	medial basal surface	16.756	1.234	1.197
fat2_wtAhead	20	medial basal surface	12.216	0.9	0.873
fat2_wtAhead	20	medial basal surface	12.938	0.953	0.924
fat2_wtAhead	21	medial basal surface	13.928	1.026	1.018
fat2_wtAhead	21	medial basal surface	13.452	0.991	0.983
fat2_wtAhead	21	medial basal surface	14.569	1.073	1.065
fat2_wtAhead	21	medial basal surface	10.31	0.759	0.754
fat2_wtAhead	21	medial basal surface	11.129	0.82	0.814
fat2_wtAhead	21	medial basal surface	9.051	0.667	0.662
fat2_wtAhead	21	medial basal surface	9.615	0.708	0.703
fat2_wtAhead	21	medial basal surface	10.695	0.788	0.782
fat2_wtAhead	21	medial basal surface	11.632	0.857	0.85
fat2_wtAhead	21	medial basal surface	10.728	0.79	0.784
fat2_wtAhead	21	medial basal surface	12.854	0.947	0.94
fat2_wtAhead	22	medial basal surface	18.326	1.35	1.107
fat2_wtAhead	22	medial basal surface	17.027	1.254	1.028
fat2_wtAhead	22	medial basal surface	11.902	0.877	0.719
fat2_wtAhead	22	medial basal surface	16.731	1.232	1.01
fat2_wtAhead	23	medial basal surface	16.091	1.185	1.008
fat2_wtAhead	23	medial basal surface	16.275	1.199	1.019
fat2_wtAhead	23	medial basal surface	13.598	1.001	0.852
fat2_wtAhead	23	medial basal surface	14.032	1.033	0.879
fat2_wtAhead	23	medial basal surface	15.219	1.121	0.953
fat2_wtAhead	23	medial basal surface	11.521	0.848	0.722
fat2_wtAhead	23	medial basal surface	11.886	0.875	0.745
fat2_wtAhead	23	medial basal surface	13.245	0.975	0.83
fat2_wtAhead	23	medial basal surface	12.889	0.949	0.807
fat2_wtAhead	24	medial basal surface	13.866	1.021	0.931
fat2_wtAhead	24	medial basal surface	17.234	1.269	1.157
fat2_wtAhead	24	medial basal surface	13.378	0.985	0.898
fat2_wtAhead	24	medial basal surface	13.657	1.006	0.917
fat2_wtAhead	24	medial basal surface	15.158	1.116	1.017
fat2_wtAhead	24	medial basal surface	13.409	0.988	0.9
fat2_wtAhead	24	medial basal surface	12.635	0.931	0.848
fat2_wtAhead	24	medial basal surface	15.468	1.139	1.038
fat2_wtAhead	24	medial basal surface	15.824	1.165	1.062
fat2_wtAhead	24	medial basal surface	11.667	0.859	0.783
fat2_wtAhead	24	medial basal surface	14.609	1.076	0.981
fat2_wtAhead	25	medial basal surface	12.597	0.928	0.902
fat2_wtAhead	25	medial basal surface	15.905	1.171	1.138
fat2_wtAhead	25	medial basal surface	14.256	1.05	1.02
fat2_wtAhead	25	medial basal surface	13.308	0.98	0.953
fat2_wtAhead	25	medial basal surface	12.336	0.908	0.883
fat2_wtAhead	25	medial basal surface	12.639	0.931	0.905
fat2_wtAhead	25	medial basal surface	11.414	0.841	0.817
wt_fat2Ahead	2	medial basal surface	10.902	0.803	0.969
wt_fat2Ahead	2	medial basal surface	8.995	0.662	0.8
wt_fat2Ahead	2	medial basal surface	9.684	0.713	0.861
wt_fat2Ahead	3	medial basal surface	10.689	0.787	1.105
wt_fat2Ahead	3	medial basal surface	11.668	0.859	1.207
wt_fat2Ahead	3	medial basal surface	10.004	0.737	1.035
wt_fat2Ahead	3	medial basal surface	12.84	0.946	1.328
wt_fat2Ahead	3	medial basal surface	10.376	0.764	1.073
wt_fat2Ahead	4	medial basal surface	12.098	0.891	1.04
wt_fat2Ahead	4	medial basal surface	11.239	0.828	0.966
wt_fat2Ahead	4	medial basal surface	10.004	0.737	0.86
wt_fat2Ahead	4	medial basal surface	9.725	0.716	0.836
wt_fat2Ahead	5	medial basal surface	9.711	0.715	0.804
wt_fat2Ahead	5	medial basal surface	10.397	0.766	0.861
wt_fat2Ahead	5	medial basal surface	11.211	0.826	0.928
wt_fat2Ahead	5	medial basal surface	11.961	0.881	0.99
wt_fat2Ahead	5	medial basal surface	11.744	0.865	0.972
wt_fat2Ahead	5	medial basal surface	9.217	0.679	0.763
wt_fat2Ahead	5	medial basal surface	12.697	0.935	1.051
wt_fat2Ahead	6	medial basal surface	13.431	0.989	1.095
wt_fat2Ahead	6	medial basal surface	12.931	0.952	1.055
wt_fat2Ahead	6	medial basal surface	11.037	0.813	0.9
wt_fat2Ahead	6	medial basal surface	9.197	0.677	0.75
wt_fat2Ahead	6	medial basal surface	10.594	0.78	0.864
wt_fat2Ahead	6	medial basal surface	11.03	0.812	0.9
wt_fat2Ahead	6	medial basal surface	10.833	0.798	0.883
wt_fat2Ahead	6	medial basal surface	12.522	0.922	1.021
wt_fat2Ahead	8	medial basal surface	13.141	0.968	1.006
wt_fat2Ahead	8	medial basal surface	14.091	1.038	1.079
wt_fat2Ahead	8	medial basal surface	14.639	1.078	1.121
wt_fat2Ahead	8	medial basal surface	12.883	0.949	0.987
wt_fat2Ahead	8	medial basal surface	11.698	0.861	0.896
wt_fat2Ahead	9	medial basal surface	13.539	0.997	1.161
wt_fat2Ahead	9	medial basal surface	16.982	1.251	1.457
wt_fat2Ahead	11	medial basal surface	9.768	0.719	0.839
wt_fat2Ahead	11	medial basal surface	11.366	0.837	0.976
wt_fat2Ahead	11	medial basal surface	13.237	0.975	1.137
wt_fat2Ahead	11	medial basal surface	12.611	0.929	1.083
wt_fat2Ahead	17	medial basal surface	15.944	1.174	1.083
wt_fat2Ahead	17	medial basal surface	12.612	0.929	0.857
wt_fat2Ahead	17	medial basal surface	12.939	0.953	0.879
wt_fat2Ahead	17	medial basal surface	12.857	0.947	0.873
wt_fat2Ahead	17	medial basal surface	15.305	1.127	1.04
wt_fat2Ahead	18	medial basal surface	16.456	1.212	0.981
wt_fat2Ahead	18	medial basal surface	17.007	1.252	1.014
wt_fat2Ahead	18	medial basal surface	17.204	1.267	1.026
wt_fat2Ahead	18	medial basal surface	19.742	1.454	1.177
wt_fat2Ahead	18	medial basal surface	14.711	1.083	0.877
wt_fat2Ahead	18	medial basal surface	20.172	1.486	1.203
wt_fat2Ahead	19	medial basal surface	13.65	1.005	0.913
wt_fat2Ahead	19	medial basal surface	15.842	1.167	1.06
wt_fat2Ahead	19	medial basal surface	15.322	1.128	1.025
wt_fat2Ahead	19	medial basal surface	14.269	1.051	0.955
wt_fat2Ahead	19	medial basal surface	15.284	1.126	1.023
wt_fat2Ahead	19	medial basal surface	17.577	1.294	1.176
wt_fat2Ahead	19	medial basal surface	16.029	1.18	1.073
wt_fat2Ahead	19	medial basal surface	15.795	1.163	1.057
wt_fat2Ahead	19	medial basal surface	16.285	1.199	1.09
wt_fat2Ahead	19	medial basal surface	14.019	1.032	0.938
wt_fat2Ahead	20	medial basal surface	13.945	1.027	0.996
wt_fat2Ahead	20	medial basal surface	10.987	0.809	0.785
wt_fat2Ahead	20	medial basal surface	10.928	0.805	0.781
wt_fat2Ahead	20	medial basal surface	11.538	0.85	0.824
wt_fat2Ahead	20	medial basal surface	12.826	0.945	0.916
wt_fat2Ahead	20	medial basal surface	10.548	0.777	0.754
wt_fat2Ahead	20	medial basal surface	14.248	1.049	1.018
wt_fat2Ahead	20	medial basal surface	13.413	0.988	0.958
wt_fat2Ahead	20	medial basal surface	12.699	0.935	0.907
wt_fat2Ahead	21	medial basal surface	14.073	1.036	1.029
wt_fat2Ahead	21	medial basal surface	14.033	1.033	1.026
wt_fat2Ahead	21	medial basal surface	15.198	1.119	1.111
wt_fat2Ahead	21	medial basal surface	12.216	0.9	0.893
wt_fat2Ahead	21	medial basal surface	11.168	0.822	0.816
wt_fat2Ahead	21	medial basal surface	10.708	0.789	0.783
wt_fat2Ahead	21	medial basal surface	15.283	1.126	1.117
wt_fat2Ahead	22	medial basal surface	17.593	1.296	1.062
wt_fat2Ahead	22	medial basal surface	17.082	1.258	1.032
wt_fat2Ahead	22	medial basal surface	18.917	1.393	1.142
wt_fat2Ahead	22	medial basal surface	19.604	1.444	1.184
wt_fat2Ahead	22	medial basal surface	16.261	1.198	0.982
wt_fat2Ahead	22	medial basal surface	19.739	1.454	1.192
wt_fat2Ahead	22	medial basal surface	18.51	1.363	1.118
wt_fat2Ahead	23	medial basal surface	15.763	1.161	0.987
wt_fat2Ahead	23	medial basal surface	16.805	1.238	1.053
wt_fat2Ahead	23	medial basal surface	14.268	1.051	0.894
wt_fat2Ahead	23	medial basal surface	16.442	1.211	1.03
wt_fat2Ahead	23	medial basal surface	13.992	1.03	0.876
wt_fat2Ahead	23	medial basal surface	15.443	1.137	0.967
wt_fat2Ahead	23	medial basal surface	13.464	0.992	0.843
wt_fat2Ahead	23	medial basal surface	14.047	1.034	0.88
wt_fat2Ahead	24	medial basal surface	13.99	1.03	0.939
wt_fat2Ahead	24	medial basal surface	16.871	1.242	1.132
wt_fat2Ahead	24	medial basal surface	13.789	1.015	0.926
wt_fat2Ahead	24	medial basal surface	14.822	1.092	0.995
wt_fat2Ahead	24	medial basal surface	16.283	1.199	1.093
wt_fat2Ahead	24	medial basal surface	15.438	1.137	1.036
wt_fat2Ahead	24	medial basal surface	15.173	1.117	1.018
wt_fat2Ahead	24	medial basal surface	9.604	0.707	0.645
wt_fat2Ahead	25	medial basal surface	13.9	1.024	0.995
wt_fat2Ahead	25	medial basal surface	11.44	0.842	0.819
wt_fat2Ahead	25	medial basal surface	13.152	0.969	0.941
wt_fat2Ahead	25	medial basal surface	13.315	0.981	0.953
wt_fat2Ahead	25	medial basal surface	12.506	0.921	0.895
wt_fat2Ahead	25	medial basal surface	19.621	1.445	1.404
