# Supplementary material for: Fat2 polarizes the WAVE complex in trans to align cell protrusions for collective migration
Source: eLife. 2022 Sep 26;11:e78343. doi: 10.7554/eLife.78343 (PMC9576270; doi:10.7554/eLife.78343)
Supplement: Figure 5—source data 1. — Used to generate Figure 5E and F. [file elife-78343-fig5-data1.csv]

Genotypes	Sample	Mean leading-trailing fluorescence intensity	L-T fluorescence rescaled	Mea medial basal fluorescence	Medial basal fluorescence rescaled
wt_wtAhead	1	21.825	0.833	insufficient cells	insufficient cells
wt_wtAhead	2	20.846	0.796	11.251	0.836
wt_wtAhead	3	26.746	1.021	9.670	0.717
wt_wtAhead	4	24.423	0.932	11.633	0.854
wt_wtAhead	5	24.673	0.942	12.080	0.887
wt_wtAhead	6	26.089	0.996	12.262	0.898
wt_wtAhead	7	insufficient cells	insufficient cells	insufficient cells	insufficient cells
wt_wtAhead	8	28.382	1.084	13.059	0.957
wt_wtAhead	9	27.609	1.054	11.658	0.852
wt_wtAhead	10	insufficient cells	insufficient cells	insufficient cells	insufficient cells
wt_wtAhead	11	32.336	1.235	11.641	0.844
wt_wtAhead	12	26.423	1.009	insufficient cells	insufficient cells
wt_wtAhead	13	insufficient cells	insufficient cells	insufficient cells	insufficient cells
wt_wtAhead	14	23.657	0.903	insufficient cells	insufficient cells
wt_wtAhead	15	32.732	1.250	insufficient cells	insufficient cells
wt_wtAhead	16	27.038	1.032	insufficient cells	insufficient cells
wt_wtAhead	17	28.907	1.104	14.721	1.057
wt_wtAhead	18	27.198	1.038	16.770	1.191
wt_wtAhead	19	24.025	0.917	14.945	1.065
wt_wtAhead	20	26.496	1.012	13.998	0.993
wt_wtAhead	21	22.073	0.843	13.679	0.965
wt_wtAhead	22	insufficient cells	insufficient cells	16.559	1.175
wt_wtAhead	23	28.318	1.081	15.964	1.136
wt_wtAhead	24	30.671	1.171	14.898	1.064
wt_wtAhead	25	23.399	0.893	13.971	1.002
fat2_fat2Ahead	1	17.411	0.665	insufficient cells	insufficient cells
fat2_fat2Ahead	2	17.679	0.675	11.664	0.867
fat2_fat2Ahead	3	22.664	0.865	12.110	0.898
fat2_fat2Ahead	4	18.919	0.722	11.568	0.849
fat2_fat2Ahead	5	20.402	0.779	12.617	0.926
fat2_fat2Ahead	6	21.123	0.806	12.073	0.884
fat2_fat2Ahead	7	insufficient cells	insufficient cells	insufficient cells	insufficient cells
fat2_fat2Ahead	8	21.173	0.808	13.899	1.019
fat2_fat2Ahead	9	24.849	0.949	13.536	0.989
fat2_fat2Ahead	10	insufficient cells	insufficient cells	insufficient cells	insufficient cells
fat2_fat2Ahead	11	21.199	0.809	13.864	1.005
fat2_fat2Ahead	12	23.281	0.889	insufficient cells	insufficient cells
fat2_fat2Ahead	13	insufficient cells	insufficient cells	insufficient cells	insufficient cells
fat2_fat2Ahead	14	19.544	0.746	insufficient cells	insufficient cells
fat2_fat2Ahead	15	26.853	1.025	insufficient cells	insufficient cells
fat2_fat2Ahead	16	24.001	0.916	insufficient cells	insufficient cells
fat2_fat2Ahead	17	23.517	0.898	17.195	1.234
fat2_fat2Ahead	18	24.699	0.943	15.993	1.136
fat2_fat2Ahead	19	21.915	0.837	16.068	1.145
fat2_fat2Ahead	20	21.228	0.810	15.366	1.090
fat2_fat2Ahead	21	17.577	0.671	12.229	0.863
fat2_fat2Ahead	22	insufficient cells	insufficient cells	15.867	1.126
fat2_fat2Ahead	23	22.515	0.860	15.014	1.069
fat2_fat2Ahead	24	24.821	0.948	13.914	0.994
fat2_fat2Ahead	25	21.360	0.815	15.786	1.133
fat2_wtAhead	1	22.994	0.878	insufficient cells	insufficient cells
fat2_wtAhead	2	23.341	0.891	11.034	0.820
fat2_wtAhead	3	26.407	1.008	11.785	0.874
fat2_wtAhead	4	19.969	0.762	11.854	0.870
fat2_wtAhead	5	25.282	0.965	12.343	0.906
fat2_wtAhead	6	25.451	0.972	11.592	0.849
fat2_wtAhead	7	insufficient cells	insufficient cells	insufficient cells	insufficient cells
fat2_wtAhead	8	28.026	1.070	14.621	1.072
fat2_wtAhead	9	26.903	1.027	13.075	0.955
fat2_wtAhead	10	insufficient cells	insufficient cells	insufficient cells	insufficient cells
fat2_wtAhead	11	29.694	1.134	12.029	0.872
fat2_wtAhead	12	27.577	1.053	insufficient cells	insufficient cells
fat2_wtAhead	13	insufficient cells	insufficient cells	insufficient cells	insufficient cells
fat2_wtAhead	14	23.074	0.881	insufficient cells	insufficient cells
fat2_wtAhead	15	34.900	1.332	insufficient cells	insufficient cells
fat2_wtAhead	16	27.080	1.034	insufficient cells	insufficient cells
fat2_wtAhead	17	30.120	1.150	15.747	1.130
fat2_wtAhead	18	27.220	1.039	16.389	1.164
fat2_wtAhead	19	24.347	0.930	15.295	1.090
fat2_wtAhead	20	26.947	1.029	14.811	1.051
fat2_wtAhead	21	20.983	0.801	11.633	0.821
fat2_wtAhead	22	insufficient cells	insufficient cells	15.997	1.135
fat2_wtAhead	23	30.442	1.162	13.862	0.986
fat2_wtAhead	24	30.987	1.183	14.264	1.019
fat2_wtAhead	25	20.325	0.776	13.208	0.948
wt_fat2Ahead	1	18.075	0.690	insufficient cells	insufficient cells
wt_fat2Ahead	2	14.772	0.564	9.860	0.733
wt_fat2Ahead	3	20.306	0.775	11.115	0.825
wt_fat2Ahead	4	18.475	0.705	10.767	0.790
wt_fat2Ahead	5	17.900	0.683	10.991	0.807
wt_fat2Ahead	6	16.743	0.639	11.447	0.838
wt_fat2Ahead	7	insufficient cells	insufficient cells	insufficient cells	insufficient cells
wt_fat2Ahead	8	19.645	0.750	13.290	0.974
wt_fat2Ahead	9	24.181	0.923	15.261	1.115
wt_fat2Ahead	10	insufficient cells	insufficient cells	insufficient cells	insufficient cells
wt_fat2Ahead	11	19.355	0.739	11.746	0.851
wt_fat2Ahead	12	24.239	0.925	insufficient cells	insufficient cells
wt_fat2Ahead	13	insufficient cells	insufficient cells	insufficient cells	insufficient cells
wt_fat2Ahead	14	18.976	0.724	insufficient cells	insufficient cells
wt_fat2Ahead	15	20.944	0.800	insufficient cells	insufficient cells
wt_fat2Ahead	16	19.710	0.752	insufficient cells	insufficient cells
wt_fat2Ahead	17	22.109	0.844	13.931	1.000
wt_fat2Ahead	18	24.964	0.953	17.549	1.247
wt_fat2Ahead	19	21.281	0.812	15.407	1.098
wt_fat2Ahead	20	16.918	0.646	12.348	0.876
wt_fat2Ahead	21	18.197	0.695	13.240	0.934
wt_fat2Ahead	22	insufficient cells	insufficient cells	18.244	1.295
wt_fat2Ahead	23	23.796	0.908	15.028	1.069
wt_fat2Ahead	24	20.847	0.796	14.496	1.036
wt_fat2Ahead	25	16.686	0.637	13.989	1.004
