# Supplementary material for: Fat2 polarizes the WAVE complex in trans to align cell protrusions for collective migration
Source: eLife. 2022 Sep 26;11:e78343. doi: 10.7554/eLife.78343 (PMC9576270; doi:10.7554/eLife.78343)
Supplement: Figure 8—figure supplement 1—source data 1. — Used to generate Figure 8—figure supplement 1. [file elife-78343-fig8-figsupp1-data1.csv]

Distance (um)	Ena fluor mean	Abi fluor mean	F-actin fluor mean	Ena fluor stdev	Abi fluor stdev	F-actin fluor stdev
-0.2938	0.124982279	0.263167864	0	0.166465604	0.201363015	0.045418705
-0.22035	0.251149685	0.501740808	0.054006665	0.191258898	0.235842881	0.073297656
-0.1469	0.493359977	0.728327092	0.142989088	0.228561696	0.243097243	0.123450642
-0.07345	0.71487997	0.945034329	0.271048612	0.181526635	0.183634892	0.149590778
0	1	1	0.457755558	0	0.191781071	0.173059041
0.07345	0.752151732	0.895050507	0.646938097	0.196097711	0.187078052	0.190633653
0.1469	0.507991158	0.701861707	0.810915735	0.193347019	0.206658824	0.169255
0.22035	0.278458313	0.53622875	0.900696012	0.179512872	0.2056473	0.153689187
0.2938	0.144810021	0.389342046	0.959045287	0.134384708	0.229163058	0.127502395
0.36725	0.08738204	0.273501065	0.994725694	0.105511733	0.201997181	0.109267668
0.4407	0.074381589	0.248950433	1	0.143447881	0.224319542	0.093585097
0.51415	0.047261623	0.226840075	0.988433189	0.115565984	0.226952172	0.100630648
0.5876	0.038376402	0.184737718	0.961328852	0.087648107	0.209316322	0.122935949
0.66105	0.040496473	0.164951692	0.914353096	0.092337636	0.21771513	0.142433707
0.7345	0.029403282	0.150362159	0.851190195	0.100566145	0.224854472	0.155653965
0.80795	0.025440162	0.083450126	0.779678626	0.084528079	0.169240929	0.188444621
0.8814	0.016307373	0.072342577	0.708476996	0.079203229	0.168602391	0.210080443
0.95485	0.014891922	0.073705053	0.638998957	0.076780908	0.188481582	0.230952749
1.0283	0.017270355	0.056383745	0.541337199	0.096689813	0.168857316	0.230894759
1.10175	0.008803979	0.019981996	0.468493332	0.085605873	0.162996149	0.236802951
1.1752	0.010110939	0.009893747	0.389086415	0.087362401	0.140479196	0.239609898
1.24865	0	0	0.311142622	0.068782664	0.135332661	0.227212038
