# Supplementary material for: Fat2 polarizes the WAVE complex in trans to align cell protrusions for collective migration
Source: eLife. 2022 Sep 26;11:e78343. doi: 10.7554/eLife.78343 (PMC9576270; doi:10.7554/eLife.78343)
Supplement: Figure 8—source data 2. — Used to generate Figure 8G. [file elife-78343-fig8-data2.csv]

Distance (um)	Fat2 fluor mean	Abi fluor mean	F-actin fluor mean	Fat2 fluor stdev	Abi fluor stdev	F-actin fluor stdev
-0.34445	0.10059617196246600	0.09059351406071360	0.0	0.16498408851056100	0.14530297426293400	0.135185779025759
-0.27556	0.1608959775989610	0.11545261077797600	0.017554818968564000	0.18420836563071500	0.18182243803447100	0.14910963262458600
-0.20667	0.2717060930592340	0.17327534105531200	0.04260037388459110	0.19178839533070200	0.21028505771219100	0.1696607050512360
-0.13778	0.4964031015298830	0.35481925339662700	0.08382740362845070	0.17632266682715700	0.25053505261573400	0.1902303469814290
-0.06889	0.7550598117374080	0.5925141098414200	0.15662461120305500	0.16592502659092500	0.2876081348533840	0.2382652763528440
0	1.0	0.8426975654951320	0.2680330374960250	0.0	0.22508294081010300	0.23566174557989700
0.06889	0.8117882624890180	0.9990414214114440	0.41526902930602800	0.14539162491921200	0.16038553463671900	0.2529059542511020
0.13778	0.5590684924864830	1.0	0.5689314829981160	0.19117424375969400	0.2004263701159980	0.25314397590443000
0.20667	0.3510587078530910	0.8095725007098730	0.7324098872274940	0.1901428020331060	0.23922453631630100	0.2052870613392880
0.27556	0.2444676962509720	0.5883274980795740	0.8418945551302240	0.16026552080086600	0.2668439887306690	0.15706174480805200
0.34445	0.1902440138574690	0.4044854012658560	0.9123852387660600	0.15698145611011300	0.2103503997333600	0.1373179921461730
0.41334	0.15188791954617800	0.30333880589205400	1.0	0.15966655395049300	0.1849346044476470	0.17543739815793100
0.48223	0.11947652565026500	0.26872753224474200	0.960180248194742	0.1551221437122220	0.20086137226234700	0.1985377974847740
0.55112	0.10204440913695800	0.21306660725340400	0.9463948952807590	0.1743609118083840	0.1790487370362060	0.2261714174221120
0.62001	0.08614122911236730	0.19070225890010600	0.8992326600532660	0.1396380484037720	0.18912503437857500	0.25310541562858200
0.6889	0.0687604583520017	0.14322759629429000	0.8296001877737580	0.13651341850717300	0.16452906607789800	0.2719283013199850
0.75779	0.05468781276720920	0.1370774588450350	0.7668155929637000	0.1294947858198350	0.16198954681505900	0.2970560996035560
0.82668	0.05045015761818200	0.1323665670219170	0.7035152941215170	0.1477888572509230	0.17776111103108600	0.29916965225610100
0.89557	0.03574276340143460	0.10189893682192000	0.6424268755592320	0.10062680087122600	0.13990402274565300	0.2818784402827880
0.96446	0.031838709171229000	0.06413629382089720	0.5507756705789980	0.09731245787293510	0.14376056508353400	0.25921974270671200
1.03335	0.02101912687634310	0.03487315009044340	0.5053853960150670	0.07541811616961300	0.14156402706106100	0.24542835915977200
1.10224	0.011650447297111900	0.016407478665022200	0.46669780065158500	0.06091042505870540	0.14095303446008000	0.21078619889864300
1.17113	0.007281585306576470	0.03778503622773920	0.37555463220938600	0.07007908247554720	0.14004971173075300	0.20384181796660000
1.24002	0.00733304621164373	0.0414288973784919	0.32866003536261000	0.0506282259006093	0.13776470525781600	0.1924674994072090
1.30891	0.016157657603750100	0.021226983234130000	0.28700192714165000	0.05803531053981810	0.1372805391277340	0.1797588218745370
1.3778	0.004247984161082950	0.0	0.23254963868653400	0.07234285723806600	0.11614234872682400	0.1705671599496610
1.44669	0.0049261732027315200	0.0064185923876217600	0.17782444882530100	0.05902880071880190	0.11362223906981200	0.16779404743209200
1.51558	0.0	0.01754257555347120	0.15948479578004100	0.056993297183834800	0.1001504418452440	0.16401005480202600
