# Supplementary figures and images for: Fat2 polarizes the WAVE complex in trans to align cell protrusions for collective migration
Source: eLife journal article supplement (doi:10.7554/elife.78343), 2022-09-26

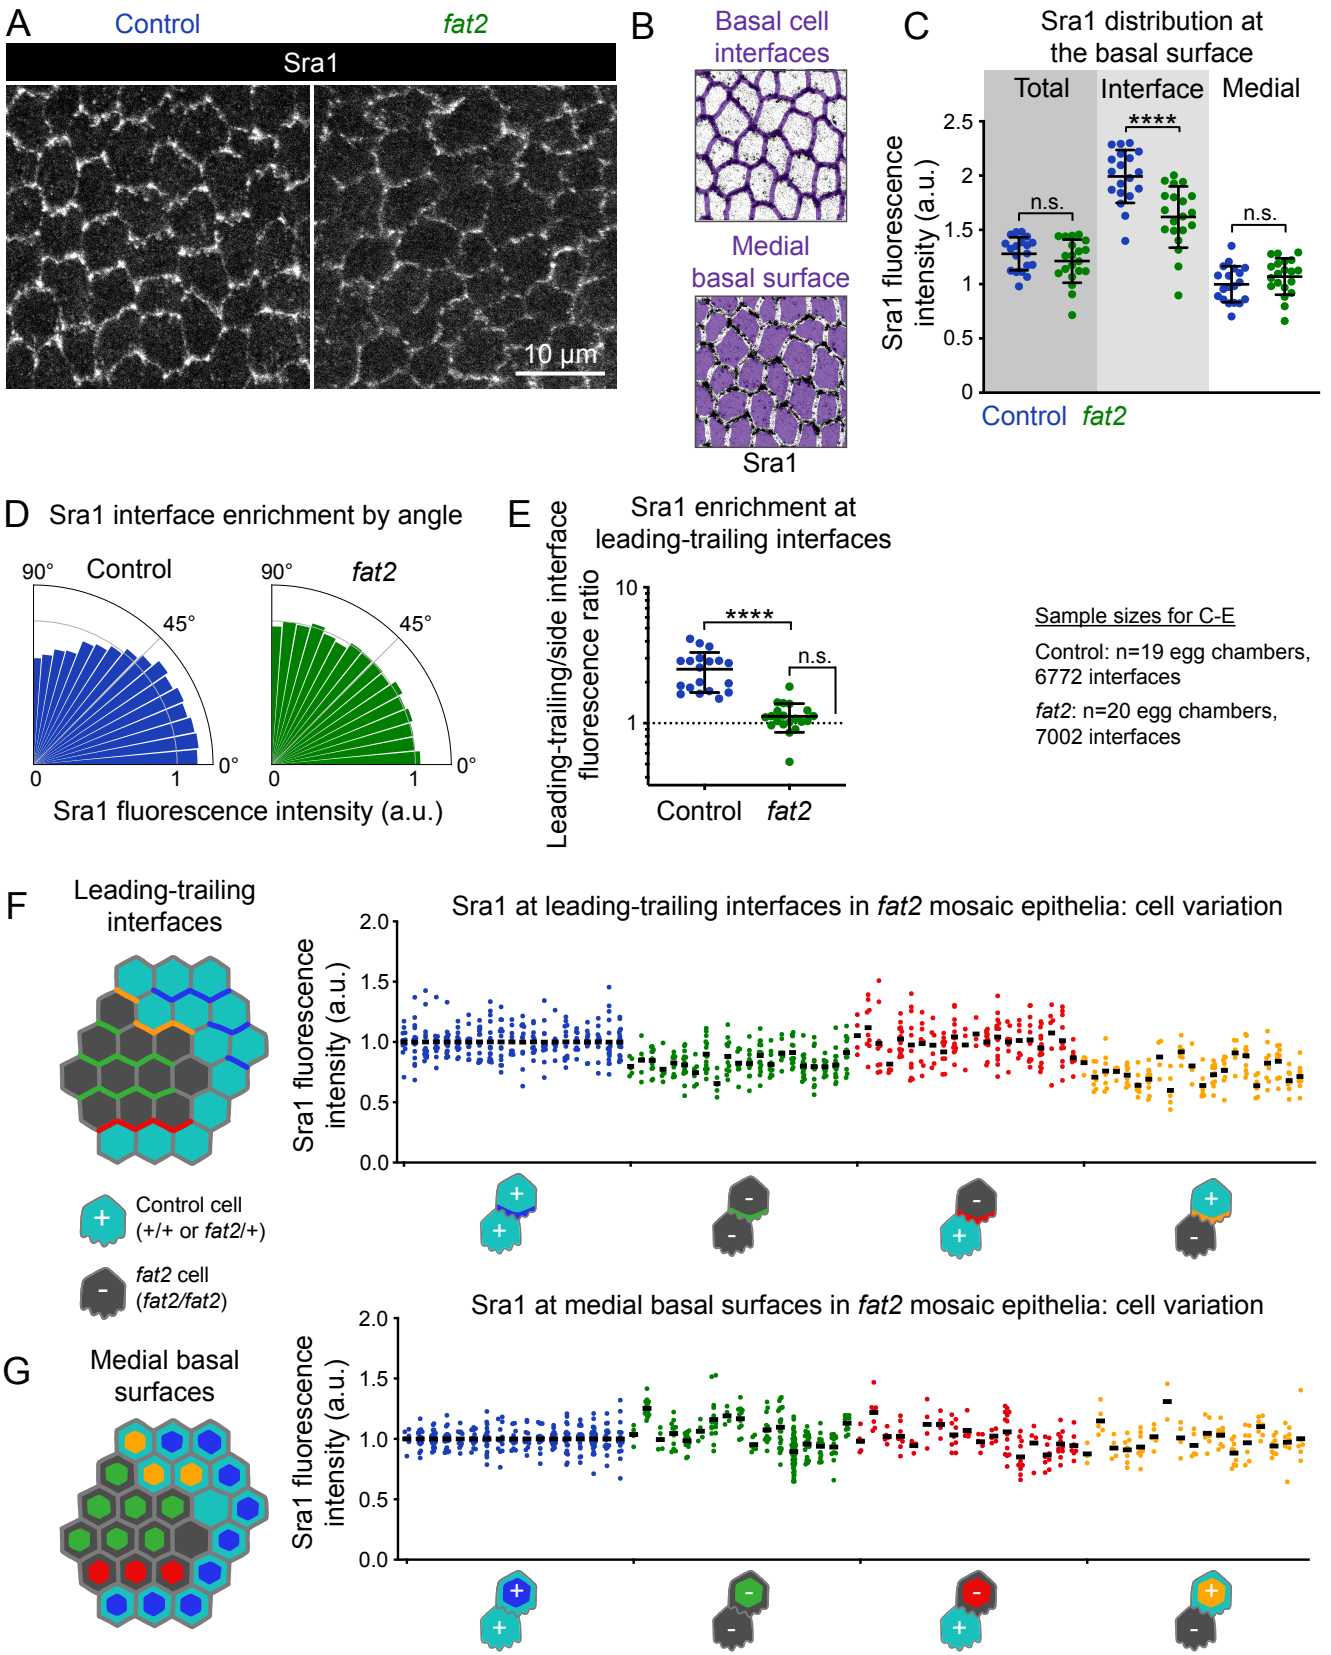

Supplement: supp [file elife-78343-supp-v1.zip]

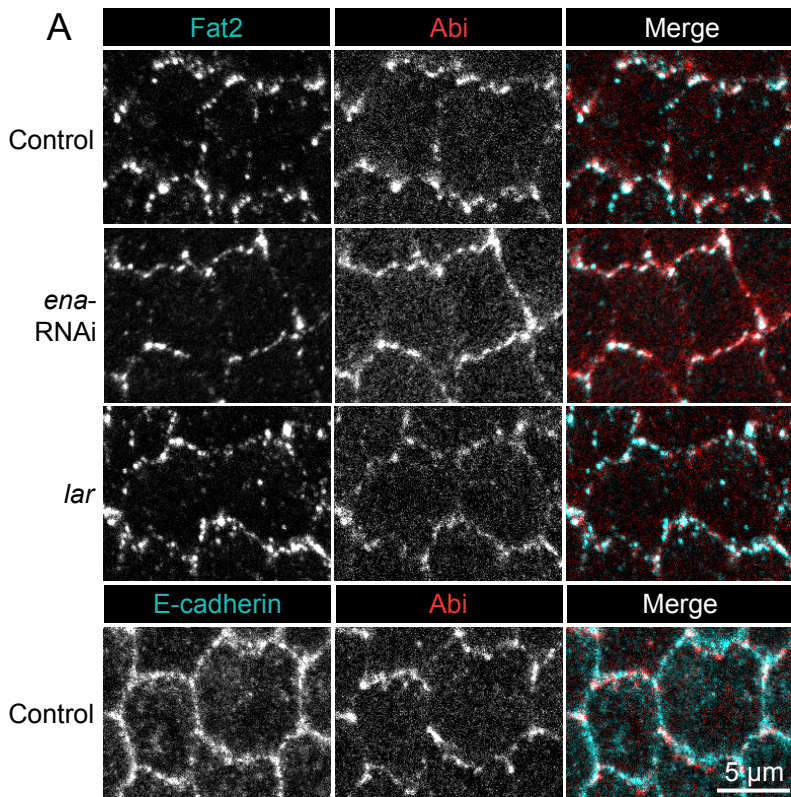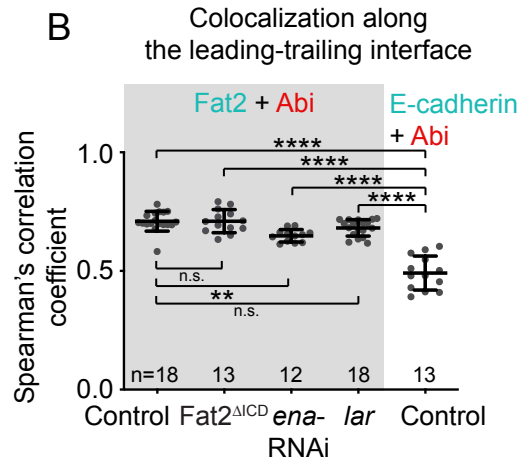

**C** Fat2-independent side protrusion

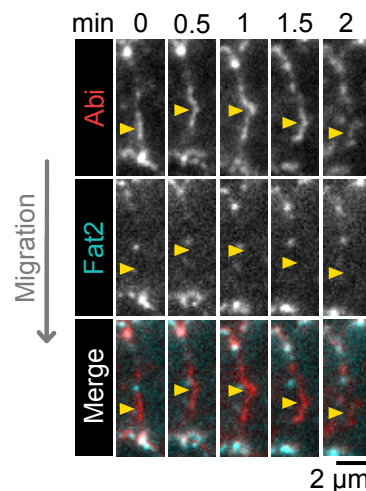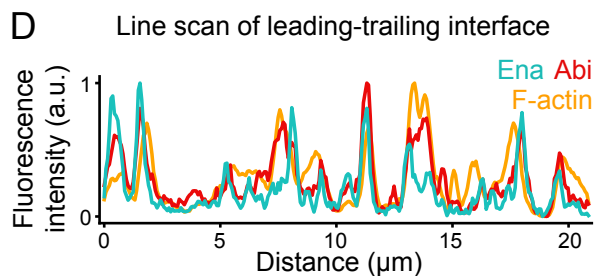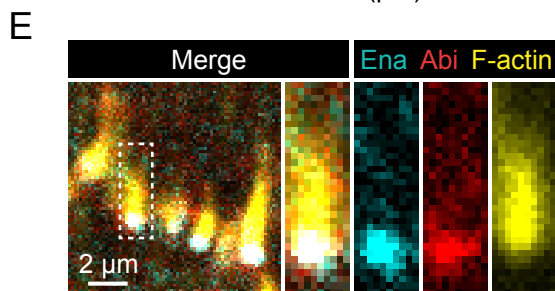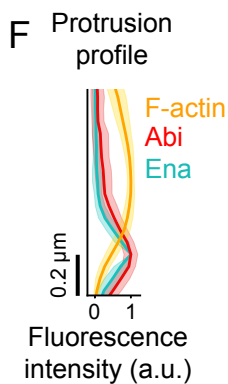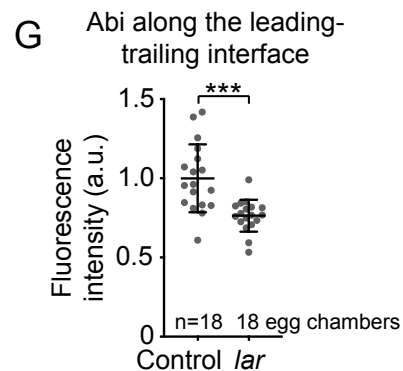

Supplement: supp [file elife-78343-supp-v1.zip]

# Sra1 association with protrusions

Control

*fat2*

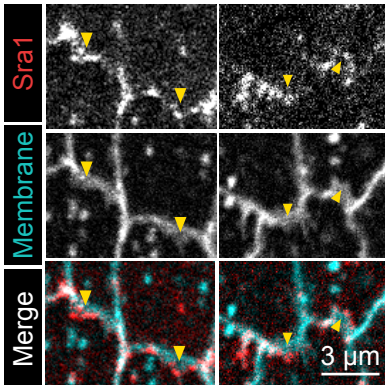

Supplement: supp [file elife-78343-supp-v1.zip]

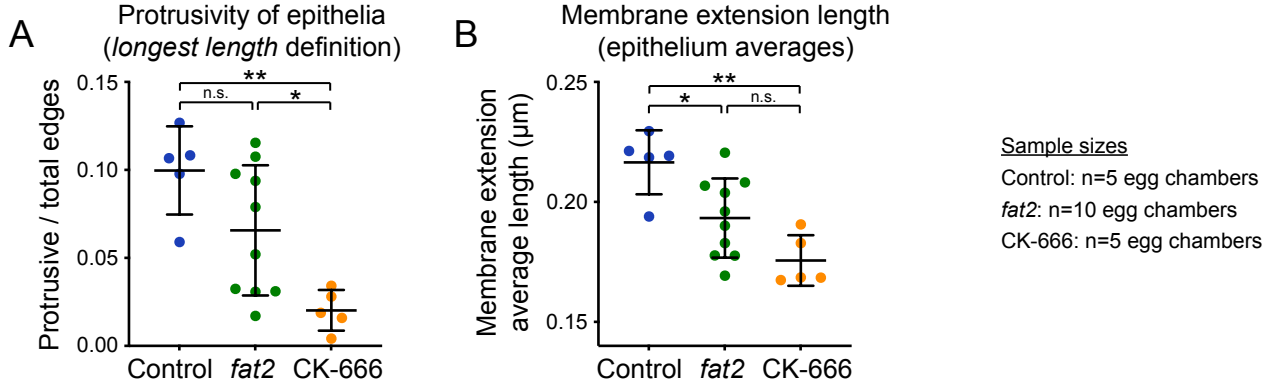

**C** Membrane protrusion planar polarity: Individual egg chambers

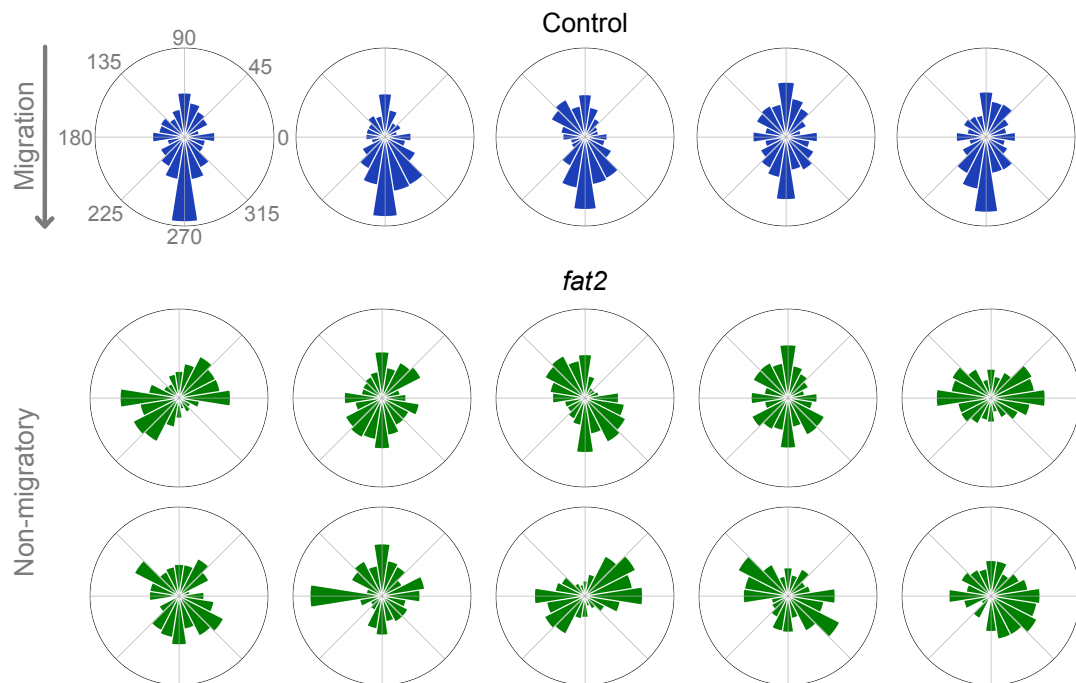

Supplement: supp [file elife-78343-supp-v1.zip]

**A**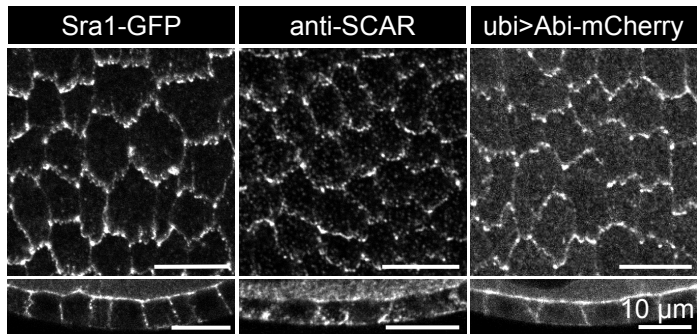**C**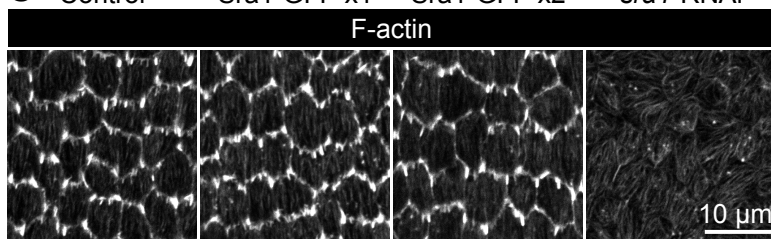**B**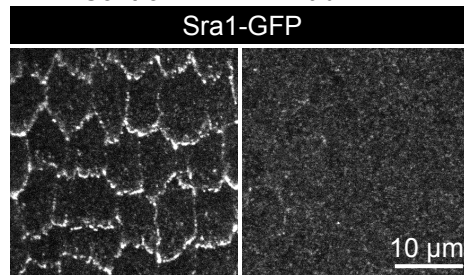**D**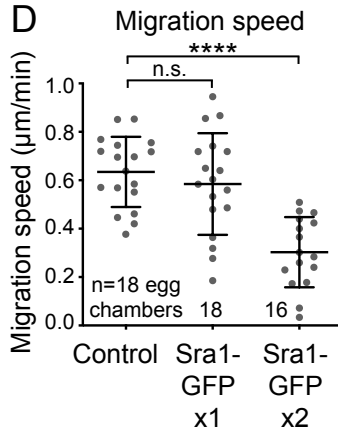

Supplement: supp [file elife-78343-supp-v1.zip]

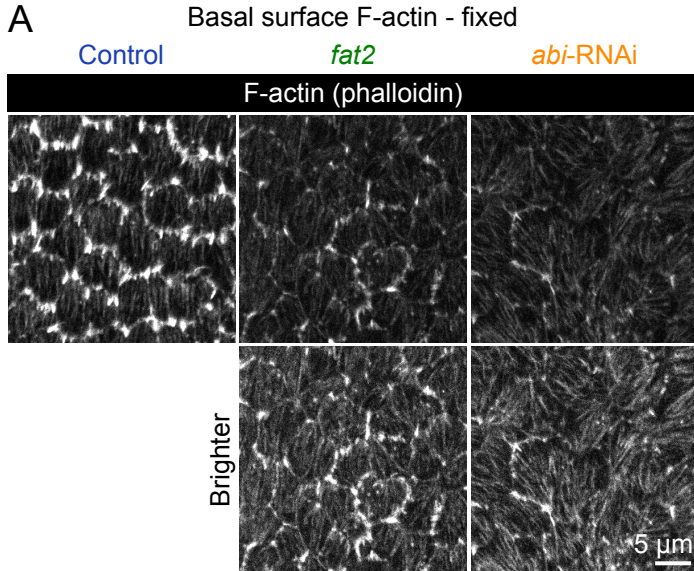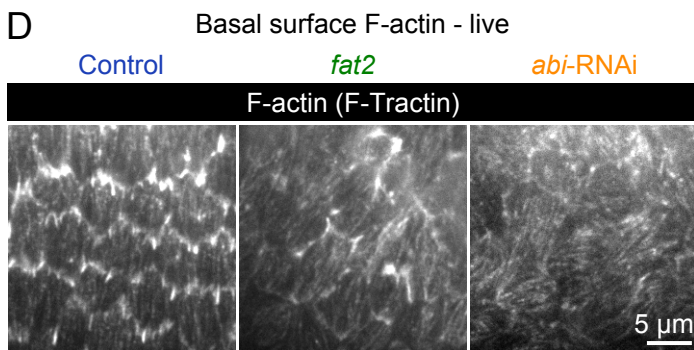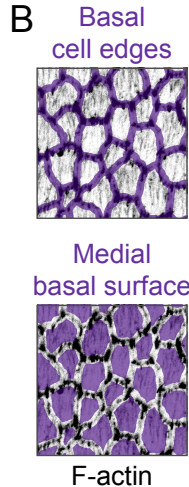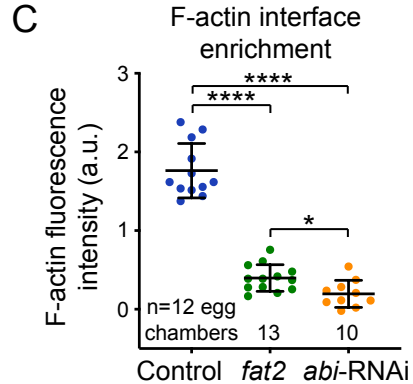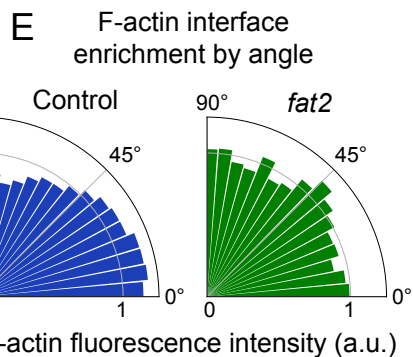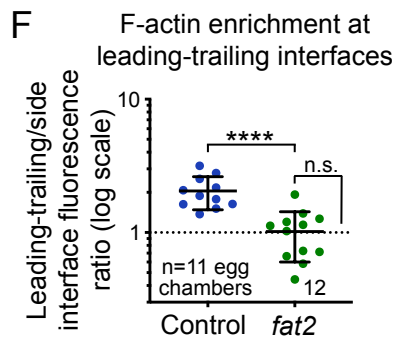

Supplement: supp [file elife-78343-supp-v1.zip]
